# Supplementary material for: Using Consumer-Wearable Activity Trackers for Risk Prediction of Life-Threatening Heart Arrhythmia in Patients with an Implantable Cardioverter-Defibrillator: An Exploratory Observational Study
Source: MDPI journal article supplement (doi:10.3390/jpm12060942), 2022-06-08
Supplement: s1 [file s1]

# Listing S1: Data Format Example

|               |                                                                                                                                                                                                   |
|---------------|---------------------------------------------------------------------------------------------------------------------------------------------------------------------------------------------------|
| Article       | Using Consumer-Wearable Activity Trackers for Risk Prediction of Life-Threatening Heart Arrhythmia in Patients with an Implantable Cardioverter-Defibrillator: An Exploratory Observational Study |
| Authors       | Diana My Frodi*, Vlad Manea*, Søren Zöga Diederichsen, Jesper Hastrup Svendsen, Katarzyna Wac, Tariq Osman Andersen<br>* equal contribution                                                       |
| Special Issue | Cardiovascular Diseases—From Risk Factors to Diagnosis and Personalized Management                                                                                                                |
| Journal       | MDPI Journal of Personalized Medicine                                                                                                                                                             |

## Table of Contents

|                                 |   |
|---------------------------------|---|
| Table of Contents               | 1 |
| Cardiac Device Data             | 1 |
| all_episodes.csv                | 1 |
| Fitbit Data                     | 2 |
| activity_level_observations.csv | 2 |
| activity_levels.csv             | 2 |
| heart_rate.csv                  | 2 |
| sleep_observations.csv          | 2 |
| sleep_stages.csv                | 2 |
| steps.csv                       | 3 |

## Cardiac Device Data

all\_episodes.csv

```
,PseudoId,TransmissionId,TransmissionTime,StartTime,DeviceModel,DeviceType,TransmissionCode,EpisodeType,Duration,AverageVentricularRate,MaximumVentricularRate,ATPSequencesDelivered,Shock,ActivityAtOnset
0,1,46,2020-01-01 00:00:00.0000000 +00:00,2020-01-01 00:00:00.0000000 +00:00,Evera S VR,ICD,PATIENT_INITIATED,PATIENT_ACTIVATED,0.0,,0,0,Unknown
```

# Fitbit Data

## activity\_level\_observations.csv

|    | <span>PseudoId</span> | ActivityTimestamp                   | <span>ActivityLevel_Id</span> |
|----|-----------------------|-------------------------------------|-------------------------------|
| 0, | 1,                    | 2020-01-01 00:00:00.0000000 +00:00, | 1                             |

## activity\_levels.csv

|    | <span>ActivityLevel</span> |
|----|----------------------------|
| 0, | 0                          |
| 1, | 1                          |
| 2, | 3                          |
| 3, | 2                          |

## heart\_rate.csv

|    | <span>PseudoId</span> | HRTimestamp                         | <span>HR</span> |
|----|-----------------------|-------------------------------------|-----------------|
| 0, | 1,                    | 2020-01-01 00:00:00.0000000 +00:00, | 60              |

## sleep\_observations.csv

|    | <span>PseudoId</span> | StepTimestamp                       | <span>Duration</span> | <span>SleepStage_Id</span> |
|----|-----------------------|-------------------------------------|-----------------------|----------------------------|
| 0, | 1,                    | 2020-01-01 00:00:00.0000000 +00:00, | 4000,                 | 1                          |

## sleep\_stages.csv

|    | <span>SleepStage</span> |
|----|-------------------------|
| 0, | asleep                  |
| 1, | awake                   |
| 2, | restless                |
| 3, | wake                    |
| 4, | light                   |
| 5, | deep                    |
| 6, | rem                     |

7, unknown

steps.csv

, PseudoId, StepTimestamp, Steps  
0, 1, 2020-01-01 00:00:00.0000000 +00:00, 10
