# Supplementary material for: Using Consumer-Wearable Activity Trackers for Risk Prediction of Life-Threatening Heart Arrhythmia in Patients with an Implantable Cardioverter-Defibrillator: An Exploratory Observational Study
Source: MDPI journal article supplement (doi:10.3390/jpm12060942), 2022-06-08
Supplement: s1 [file s1]

# Listing S2: Data Analysis Code

|               |                                                                                                                                                                                                   |
|---------------|---------------------------------------------------------------------------------------------------------------------------------------------------------------------------------------------------|
| Article       | Using Consumer-Wearable Activity Trackers for Risk Prediction of Life-Threatening Heart Arrhythmia in Patients with an Implantable Cardioverter-Defibrillator: An Exploratory Observational Study |
| Authors       | Diana My Frodi*, Vlad Manea*, Søren Zöga Diederichsen, Jesper Hastrup Svendsen, Katarzyna Wac, Tariq Osman Andersen<br>* equal contribution                                                       |
| Special Issue | Cardiovascular Diseases—From Risk Factors to Diagnosis and Personalized Management                                                                                                                |
| Journal       | MDPI Journal of Personalized Medicine                                                                                                                                                             |

## Table of Contents

|                         |    |
|-------------------------|----|
| Table of Contents       | 1  |
| Versions                | 2  |
| Python                  | 2  |
| R                       | 2  |
| Code                    | 2  |
| Python                  | 2  |
| constraints.py          | 2  |
| data_preprocessor.py    | 3  |
| days_converter.py       | 7  |
| duration_processor.py   | 8  |
| duration_validator.py   | 11 |
| heart_rate_parser.py    | 22 |
| main.ipynb              | 24 |
| sleep_parser.py         | 45 |
| variable_definitions.py | 46 |
| variable_derivator.py   | 59 |
| variable_properties.py  | 61 |

|        |    |
|--------|----|
| R      | 64 |
| main.r | 64 |

Versions

Python

| Interpreter                                                         | Environment                                                    | Libraries                                                                         |
|---------------------------------------------------------------------|----------------------------------------------------------------|-----------------------------------------------------------------------------------|
| <ul style="list-style-type: none"><li>Python 3.9.8 64-bit</li></ul> | <ul style="list-style-type: none"><li>Anaconda 2.1.1</li></ul> | <ul style="list-style-type: none"><li>numpy 1.20.3</li><li>pandas 1.3.4</li></ul> |

R

| Interpreter                                             | Environment                                                                 | Libraries                                                      |
|---------------------------------------------------------|-----------------------------------------------------------------------------|----------------------------------------------------------------|
| <ul style="list-style-type: none"><li>R 4.1.2</li></ul> | <ul style="list-style-type: none"><li>RStudio 2021.09.1 Build 372</li></ul> | <ul style="list-style-type: none"><li>survival 3.3-1</li></ul> |

Code

Python

constraints.py

```
class constraints:
    eps = 0.001

    # First grid search:
    # minimum_available_data_ratios_daily_active = [23.0 / 24.0, 21.0 / 24.0, 18.0 / 24.0]

    # Second grid search:
    # minimum_available_data_ratios_daily_active = [15.0 / 1440.0, 30.0 / 1440.0, 60.0 / 1440.0]

    # Third grid search:
    minimum_available_data_ratios_daily_active = [1.0 / 12.0, 2.0 / 12.0, 4.0 / 12.0, 8.0 / 12.0]
```

```
minimum_available_data_ratios_weekly = [0.51]

minimum_available_data_ratios_period = [0.51]

allows_zeros = [False]

allows_no_event_participants = [True]

event_types = ['VT', 'VF_VT', 'VT1', 'VT2']

maximum_weeks_before_after = 8

maximum_regression_allowed_significance = 0.05

regression_eps = 0.000001
```

## data\_preprocessor.py

```
from heart_rate_parser import heart_rate_parser
from sleep_parser import sleep_parser
from duration_processor import duration_processor
from days_converter import days_converter
from variable_derivator import variable_derivator
from variable_properties import variable_properties
from os import path

import numpy as np
import pandas as pd
import statistics

class data_preprocessor:
    def __init__(self, id_column, group_duration_column, date_numeric_column):
        self.id_column = id_column
        self.group_duration_column = group_duration_column
        self.date_numeric_column = date_numeric_column
```

```

minutes_in_hour = 60
hours_in_day = 24
days_in_week = 7

def preprocess_heart_rate(self, heart_rate_folder):
    heart_rate_file_source = heart_rate_folder + '/heart_rate.csv'
    heart_rate_file_destination = heart_rate_folder + '/heart_rate_aggregate.csv'

    if not path.exists(heart_rate_file_destination):
        print('Computing heart rates aggregate by minute.')

        aggregation_functions = {'HeartRateMin': min, 'HeartRateMax': max, 'HeartRateMean': statistics.mean, 'HeartRateMedian': statistics.median,
'HeartRateStdev': statistics.stdev}
        aggregation_minimum_sizes = {'HeartRateMin': 1, 'HeartRateMax': 1, 'HeartRateMean': 1, 'HeartRateMedian': 1, 'HeartRateStdev': 2}
        aggregation_defaults = {'HeartRateMin': np.nan, 'HeartRateMax': np.nan, 'HeartRateMean': np.nan, 'HeartRateMedian': np.nan, 'HeartRateStdev':
np.nan}

        quantiles = []#0.0, 0.01, 0.025, 0.05, 0.1, 0.25, 0.33, 0.5, 0.67, 0.75, 0.9, 0.95, 0.975, 1.0]
        aggregate_interval = variable_properties.data_frequency_minutes

        for quantile in quantiles:
            key = 'HeartRateQuantile' + str(quantile)
            aggregation_functions[key] = data_preprocessor.__get_quantile_function(quantile)
            aggregation_minimum_sizes[key] = 1
            aggregation_defaults[key] = np.nan

        heart_rate_par = heart_rate_parser(aggregation_functions, aggregation_minimum_sizes, aggregation_defaults, reporting_progress_count = 100000)
        df_heart_rate_aggregate = heart_rate_par.parse(heart_rate_file_source, self.id_column, self.group_duration_column, aggregate_interval)
        df_heart_rate_aggregate.to_csv(heart_rate_file_destination)

    def preprocess_user(self, user_id, minutely_expanded_selected_file, df_steps_observations_all, df_activity_observations_all,
df_sleep_observations_all, df_heart_rate_aggregate_all):
        variable_der = variable_derivator(self.date_numeric_column)
        print('- Preprocessing for user: {}'.format(user_id))

        if not path.exists(minutely_expanded_selected_file):

```

```

days_conv = days_converter(self.group_duration_column)

scale_from_days = data_preprocessor.minutes_in_hour * data_preprocessor.hours_in_day
df_sleep_observations_user = df_sleep_observations_all[df_sleep_observations_all[self.id_column] == user_id]
df_steps_observations_user = df_steps_observations_all[df_steps_observations_all[self.id_column] == user_id]
df_activity_observations_user = df_activity_observations_all[df_activity_observations_all[self.id_column] == user_id]
df_heart_rate_aggregate_user = df_heart_rate_aggregate_all[df_heart_rate_aggregate_all[self.id_column] == user_id]

# Sleep.
print('-> Processing sleep')
df_sleep_observations = days_conv.populate_with_date(df_sleep_observations_user, 'StepTimestamp')
df_sleep_observations = sleep_parser.parse(df_sleep_observations, self.id_column, self.group_duration_column, 'SleepStage_Id', 'Duration')

# Steps.
print('-> Processing steps')
df_steps_observations = days_conv.populate_with_date(df_steps_observations_user, 'StepTimestamp')
df_steps_count = duration_processor.compute_duration_metric_count(df_steps_observations, self.id_column, 'StepsCount', 'Steps',
self.group_duration_column)

# Activity.
print('-> Processing activity')
df_activity_observations = days_conv.populate_with_date(df_activity_observations_user, 'ActivityTimestamp')
df_activity_level_one_hot = pd.get_dummies(df_activity_observations['ActivityLevel_Id'], prefix = 'ActivityLevel_Id_')
df_activity_observations = df_activity_observations.drop('ActivityLevel_Id', axis = 1)
df_activity_observations = df_activity_observations.join(df_activity_level_one_hot)

# Heart rate.
print('-> Processing heart rate')
# Do nothing here, not needed.
df_heart_rate_aggregate = df_heart_rate_aggregate_user

print('-> Processing minutely')
df_minutely, columns_minutely = duration_processor.compute_duration_dataframe([df_steps_observations, df_heart_rate_aggregate,
df_activity_observations, df_sleep_observations], self.id_column, self.group_duration_column)
df_minutely = pd.merge(df_minutely, df_steps_count, on = columns_minutely, how = 'outer')
df_minutely = pd.merge(df_minutely, df_heart_rate_aggregate, on = columns_minutely, how = 'outer')

```

```

df_minutely = pd.merge(df_minutely, df_activity_observations, on = columns_minutely, how = 'outer')
df_minutely = pd.merge(df_minutely, df_sleep_observations, on = columns_minutely, how = 'outer')

if self.group_duration_column in df_minutely.columns:
    func = lambda value: value // (data_preprocessor.hours_in_day * data_preprocessor.minutes_in_hour)
    df_minutely[self.date_numeric_column] = df_minutely[self.group_duration_column].map(func)

df_minutely.sort_values(by = [self.id_column, self.group_duration_column], inplace = True)
print('-> Minutely done')

df_minutely_expanded = variable_der.derive(df_minutely)
df_minutely_expanded.to_csv(minutely_expanded_selected_file)
print('-> Minutely expanded done')

def get_wearable_user_ids(self, df_steps_observations_all, df_activity_observations_all, df_sleep_observations_all, df_heart_rate_aggregate_all):
    wearable_user_ids = set()
    wearable_user_ids.update(df_steps_observations_all[self.id_column].unique())
    wearable_user_ids.update(df_activity_observations_all[self.id_column].unique())
    wearable_user_ids.update(df_sleep_observations_all[self.id_column].unique())
    wearable_user_ids.update(df_heart_rate_aggregate_all[self.id_column].unique())
    return wearable_user_ids

def get_pacemaker_user_ids(self, df_cardiac):
    pacemaker_user_ids = set()
    pacemaker_user_ids.update(df_cardiac[self.id_column].unique())
    return pacemaker_user_ids

def get_intersection_user_ids(self, df_cardiac, df_steps_observations_all, df_activity_observations_all, df_sleep_observations_all,
df_heart_rate_aggregate_all):
    wearable_user_ids = self.get_wearable_user_ids(df_steps_observations_all, df_activity_observations_all, df_sleep_observations_all,
df_heart_rate_aggregate_all)
    pacemaker_user_ids = self.get_pacemaker_user_ids(df_cardiac)
    return pacemaker_user_ids.intersection(wearable_user_ids)

def get_union_user_ids(self, df_cardiac, df_steps_observations_all, df_activity_observations_all, df_sleep_observations_all,
df_heart_rate_aggregate_all):

```

```

        wearable_user_ids = self.get_wearable_user_ids(df_steps_observations_all, df_activity_observations_all, df_sleep_observations_all,
df_heart_rate_aggregate_all)
        pacemaker_user_ids = self.get_pacemaker_user_ids(df_cardiac)
        return pacemaker_user_ids.union(wearable_user_ids)

    @staticmethod
    def __get_quantile_function(quantile):
        def quant(values):
            return np.quantile(values, quantile)

        return quant

```

## days\_converter.py

```

import numpy as np
from datetime import datetime, timedelta

class days_converter:
    start_date = datetime(2016, 1, 1)

    def __init__(self, group_duration_column):
        self.group_duration_column = group_duration_column

    def populate_with_date(self, df, datetime_column_name):
        df['DateNumeric'] = df[datetime_column_name].map(days_converter.convert_to_days)
        df[self.group_duration_column] = df[datetime_column_name].map(days_converter.convert_to_minutes)
        df['WeekNumeric'] = df[datetime_column_name].map(lambda row: days_converter.convert_to_days(row) // 7)
        return df

    @staticmethod
    def convert_to_days(date_str):
        date = np.nan

        if '+00:00' not in date_str:
            raise('Does not have +00:00')

```

```

    try:
        date = datetime.strptime(date_str[0:10], '%Y-%m-%d')
    except:
        return np.nan

    days = (date - days_converter.start_date).days
    return int(days)

@staticmethod
def convert_to_minutes(date_str):
    date = np.nan

    if '+00:00' not in date_str:
        raise('Does not have +00:00')

    try:
        date = datetime.strptime(date_str[0:16], '%Y-%m-%d %H:%M')
    except:
        return np.nan

    days = days_converter.convert_to_days(date_str)
    minutes = days * 1440 + date.hour * 60 + date.minute
    return minutes

@staticmethod
def get_date(date_numeric):
    return days_converter.start_date + timedelta(days = date_numeric)

```

## duration\_processor.py

```

import pandas as pd
import numpy as np
from datetime import datetime

class duration_processor:

```



```

@staticmethod
def compute_duration_dataframe(dfs, id_column, group_duration_column):
    mapping_users_durations = dict()

    for df in dfs:
        df_grouped_users = df.groupby(id_column)

        for user_id, df_group_user in df_grouped_users:
            mapping_users_durations[user_id] = mapping_users_durations.get(user_id, set())
            df_grouped_duration = df_group_user.groupby(group_duration_column)

            for duration_numeric, df_group_duration in df_grouped_duration:
                mapping_users_durations[user_id].add(duration_numeric)

    rows_pd = []

    for user_id, durations_numeric in mapping_users_durations.items():
        for duration_numeric in durations_numeric:
            new_row_pd = [user_id, duration_numeric]
            rows_pd.append(new_row_pd)

    columns = [id_column, group_duration_column]
    df_duration = pd.DataFrame(rows_pd, columns = columns)

    #print(df_duration)
    return (df_duration, columns)

@staticmethod
def compute_duration_metric_count(df, id_column, new_name_column, value_column, group_duration_column, filter_column = None, filter_value = None):
    columns = [id_column, group_duration_column, new_name_column]
    df_grouped_users = df.groupby(id_column)
    results_pd = []

    for user_id, df_group_user in df_grouped_users:
        df_grouped_duration = df_group_user.groupby(group_duration_column)
        duration_pd = []

```

```

for duration_numeric, df_group_duration in df_grouped_duration:
    total_value = 0

    for index, row in df_group_duration.iterrows():
        if (filter_column is None) or (row[filter_column] == filter_value):
            total_value += row[value_column]

    if total_value > 0:
        new_row = [user_id, duration_numeric, total_value]
        duration_pd.append(new_row)

        #print('Raw:')
        #print(df_group_duration)
        #print('Processed:')
        #print(new_row)

    results_pd.extend(duration_pd)

df_result = pd.DataFrame(results_pd, columns = columns)
return df_result

@staticmethod
def __get_seconds(duration_str):
    if '+00:00' not in duration_str:
        raise('Does not have +00:00')

    try:
        duration_time = datetime.strptime(duration_str[0:19], '%Y-%m-%d %H:%M:%S')
        duration = datetime.strptime(duration_str[0:10], '%Y-%m-%d')
    except:
        return np.nan

    seconds = (duration_time - duration).seconds
    return int(seconds)

```

## duration\_validator.py

```
import numpy as np

from variable_definitions import variable_definitions
from variable_properties import variable_properties
from constraints import constraints

class duration_validator:
    minutes_in_hour = 60
    hours_in_day = 24
    days_in_week = 7

    def __init__(self, date_numeric_column, drop_column_name, minimum_available_data_ratio_daily_active, minimum_available_data_ratio_weekly,
minimum_available_data_ratio_period, allow_zeros):
        self.date_numeric_column = date_numeric_column
        self.drop_column_name = drop_column_name
        self.minimum_available_data_ratio_daily_active = minimum_available_data_ratio_daily_active
        self.minimum_available_data_ratio_weekly = minimum_available_data_ratio_weekly
        self.minimum_available_data_ratio_period = minimum_available_data_ratio_period
        self.allow_zeros = allow_zeros

    @staticmethod
    def get_first_day(cardiac_date, weeks_before, leeway):
        return cardiac_date - 7 * weeks_before * (1 + leeway)

    @staticmethod
    def get_last_day(cardiac_date, weeks_before, leeway):
        return duration_validator.get_first_day(cardiac_date, weeks_before, leeway) + 6

    @staticmethod
    def get_last_day_period(cardiac_date, weeks_before, leeway):
        return duration_validator.get_first_day(cardiac_date, weeks_before, leeway) + 7 * weeks_before - 1

    @staticmethod
    def get_hour(timestamp):
        try:
```

```

        return int(timestamp[11:13])
    except:
        return -1

def __is_event_conflict(self, first_day, cardiac_date, df_cardiac_user):
    count_cardiac_events_any_day = df_cardiac_user[(first_day <= df_cardiac_user[self.date_numeric_column]) &
(df_cardiac_user[self.date_numeric_column] < cardiac_date)].shape[0]
    return (count_cardiac_events_any_day > 0)

def __is_valid_day_by_count(self, df_minutely_date):

    # First and second grid search:
    # df_daily_time_total_dropna = df_minutely_date.dropna(subset = [self.drop_column_name])
    # df_daily_time_total_zeros = df_daily_time_total_dropna[(df_daily_time_total_dropna[self.drop_column_name] < -constraints.eps) |
(df_daily_time_total_dropna[self.drop_column_name] > constraints.eps)]

    df_daily_time_total_daylight = df_minutely_date[df_minutely_date.apply(lambda row: 8 <= duration_validator.get_hour(row['ActivityTimestamp']) and
duration_validator.get_hour(row['ActivityTimestamp']) <= 19, axis=1)]
    df_daily_time_total_dropna = df_daily_time_total_daylight.dropna(subset = [self.drop_column_name])
    df_daily_time_total_zeros = df_daily_time_total_dropna[(df_daily_time_total_dropna[self.drop_column_name] < -constraints.eps) |
(df_daily_time_total_dropna[self.drop_column_name] > constraints.eps)]

    bar_size = df_daily_time_total_zeros.shape[0] * 1.0

    # First and second grid search:
    # expected_bar_size = 1.0 * duration_validator.minutes_in_hour * duration_validator.hours_in_day * self.minimum_available_data_ratio_daily_active
/ variable_properties.data_frequency_minutes

    # Third grid search:
    expected_bar_size = 1.0 * duration_validator.minutes_in_hour * duration_validator.hours_in_day * self.minimum_available_data_ratio_daily_active /
variable_properties.data_frequency_minutes / 2.0

    is_valid = bar_size >= expected_bar_size

    return (is_valid, bar_size, expected_bar_size)

```

```

def get_valid_days(self, df_minutely_expanded_selected, df_cardiac_user):
    valid_days = dict()

    min_valid_bar = float('inf')
    max_valid_bar = float('-inf')

    for date_numeric, df_minutely_date in df_minutely_expanded_selected.groupby(self.date_numeric_column):
        invalid_reason = None
        (is_valid, bar_size, expected_bar_size) = self.__is_valid_day_by_count(df_minutely_date)

        min_valid_bar = min(min_valid_bar, expected_bar_size)
        max_valid_bar = max(max_valid_bar, expected_bar_size)

        if is_valid:
            if self.__is_event_conflict(date_numeric, date_numeric + 1, df_cardiac_user):
                invalid_reason = 'conflict with event'
        else:
            invalid_reason = 'not enough entries'

        if is_valid and (invalid_reason is None):
            valid_days[date_numeric] = bar_size

    # print('Min valid bar: {}'.format(min_valid_bar))
    # print('Max valid bar: {}'.format(max_valid_bar))

    return valid_days

def get_valid_weeks(self, valid_days, df_cardiac_user):
    valid_weeks = dict()
    minimum_available_data_ratios_weekly = self.minimum_available_data_ratio_weekly

    valid_user_dates = set()

    for valid_user_date in valid_days.keys():
        valid_range = range(valid_user_date - 8, valid_user_date + 8)
        valid_user_dates.update(valid_range)

```

```

valid_user_dates = sorted(valid_user_dates)

for cardiac_user_date in valid_user_dates:
    is_valid = False
    invalid_reason = None
    first_day = duration_validator.get_first_day(cardiac_user_date, 1, 0)
    last_day = duration_validator.get_last_day(cardiac_user_date, 1, 0)

    count_valid_days = 0

    for any_day in range(first_day, last_day + 1):
        if any_day in valid_days:
            count_valid_days = 1 + count_valid_days

    if not self.__is_event_conflict(first_day, cardiac_user_date, df_cardiac_user):
        if count_valid_days >= 1.0 * minimum_available_data_ratios_weekly * duration_validator.days_in_week:
            is_valid = True
        else:
            invalid_reason = 'not enough entries'
    else:
        invalid_reason = 'conflict with event'

    if is_valid and (invalid_reason is None):
        valid_weeks[cardiac_user_date] = count_valid_days

return valid_weeks

def get_valid_periods(self, valid_weeks, df_cardiac_user, max_weeks_before_after):
    valid_periods = dict()
    minimum_available_data_ratio_period = self.minimum_available_data_ratio_period

    valid_user_dates = set()

    for valid_user_date in valid_weeks.keys():
        valid_range = range(valid_user_date - 8 * max_weeks_before_after, valid_user_date + 8 * max_weeks_before_after + 1)

```

```

        valid_user_dates.update(valid_range)

valid_user_dates = sorted(valid_user_dates)

for cardiac_user_date in valid_user_dates:
    valid_periods[cardiac_user_date] = valid_periods.get(cardiac_user_date, dict())

    for leeway in [0]:
        valid_periods[cardiac_user_date][leeway] = valid_periods[cardiac_user_date].get(leeway, dict())
        max_weeks_limit = max_weeks_before_after // (1 + leeway)

        for week_before_after in range(1, 1 + max_weeks_limit):
            is_valid = False
            invalid_reason = None
            first_day = duration_validator.get_first_day(cardiac_user_date, week_before_after, leeway)

            valid_weeks_inside = [valid_week for valid_week in range(1, 1 + week_before_after) if (cardiac_user_date - valid_week *
duration_validator.days_in_week + duration_validator.days_in_week) in valid_weeks]
            count_valid_weeks = len(valid_weeks_inside)

            if not self.__is_event_conflict(first_day, cardiac_user_date, df_cardiac_user):
                if count_valid_weeks >= 1.0 * week_before_after * minimum_available_data_ratio_period:
                    is_valid = True
                else:
                    invalid_reason = 'not enough entries'
            else:
                invalid_reason = 'conflict with event'

            if is_valid and (invalid_reason is None):
                valid_periods[cardiac_user_date][leeway][week_before_after] = count_valid_weeks

    return valid_periods

def __compute_means(self, valid_days, df_duration):
    target_column_daily_aggregation_functions = variable_properties.target_column_daily_aggregation_functions
    values = dict()

```

```

for valid_day, bar_size in valid_days.items():
    df_duration_day = df_duration[df_duration[self.date_numeric_column] == valid_day]

    for variable_name, aggregates in target_column_daily_aggregation_functions.items():
        df_duration_day_var_dropna = df_duration_day.dropna(subset = [variable_name])

        df_duration_day_var_zeros = df_duration_day_var_dropna

        if not self.allow_zeros:
            df_duration_day_var_zeros = df_duration_day_var_dropna[(df_duration_day_var_dropna[variable_name] < -constraints.eps) |
(df_duration_day_var_dropna[variable_name] > constraints.eps)]

        if df_duration_day_var_zeros.shape[0] <= 0:
            continue

        for aggregate_name, aggregate_func in aggregates.items():
            aggregate_value = aggregate_func(df_duration_day_var_zeros[variable_name])

            if not np.isnan(aggregate_value):
                values[variable_name] = values.get(variable_name, dict())
                values[variable_name][aggregate_name] = values[variable_name].get(aggregate_name, list())
                values[variable_name][aggregate_name].append(aggregate_value)

values_means = dict()
values_stds = dict()

for variable_name, aggregations in values.items():
    values_means[variable_name] = values_means.get(variable_name, dict())
    values_stds[variable_name] = values_stds.get(variable_name, dict())

    for aggregate_name, values in aggregations.items():
        values_means[variable_name][aggregate_name] = np.mean(values)
        values_stds[variable_name][aggregate_name] = np.std(values)

return (values_means, values_stds)

```



```

def get_valid_daily_aggregates(self, user_id, df_minutely, valid_days):
    day_rows = []
    target_column_daily_aggregation_functions = variable_properties.target_column_daily_aggregation_functions
    behaviour_column_names = variable_definitions.behaviour_target_variable_names

    # Non-compositional.
    for valid_day, valid_day_count in valid_days.items():
        df_day = df_minutely[df_minutely[self.date_numeric_column] == valid_day]

        for column in behaviour_column_names:
            if column not in df_day:
                continue

            df_column_dropna = df_day.dropna(subset = [column])

            df_column_zeros = df_column_dropna

            if not self.allow_zeros:
                df_column_zeros = df_column_dropna[(df_column_dropna[column] < -constraints.eps) | (df_column_dropna[column] > constraints.eps)]

            df_column_col = df_column_zeros[column]
            values_size = len(df_column_col)

            if column not in target_column_daily_aggregation_functions:
                continue

            aggregate_functions = target_column_daily_aggregation_functions[column]

            for aggregate_function_name, aggregate_function in aggregate_functions.items():
                value = aggregate_function(df_column_col)
                day_row = [user_id, valid_day, column, aggregate_function_name, values_size, value]
                day_rows.append(day_row)

    return day_rows

```

```

def get_valid_weekly_aggregates(self, user_id, df_cardiac_user, df_daily_values_user, valid_weeks):
    event_column_names = variable_definitions.event_target_variable_names
    minimum_available_data_ratios_weekly = self.minimum_available_data_ratio_weekly

    week_rows = []

    # valid_weeks[cardiac_user_date][week_before_after] = count_valid_days

    for cardiac_user_date, valid_weeks_date in valid_weeks.items():
        df_cardiac_event = df_cardiac_user[df_cardiac_user[self.date_numeric_column] == cardiac_user_date]
        has_event = False

        # Get the event information.
        event_properties_lists = dict()
        for idx, row in df_cardiac_event.iterrows():
            has_event = True

            for event_column_name in event_column_names:
                event_properties_lists[event_column_name] = event_properties_lists.get(event_column_name, list())
                event_properties_lists[event_column_name].append(row[event_column_name])

        event_properties = dict()
        event_variable_aggregates = variable_properties.event_variable_aggregates
        for event_column_name, event_column_list in event_properties_lists.items():
            aggregate = event_variable_aggregates[event_column_name]
            event_properties[event_column_name] = aggregate(event_properties_lists[event_column_name])

        for event_column_name in event_column_names:
            if event_column_name not in event_properties:
                event_properties[event_column_name] = None

        first_day = duration_validator.get_first_day(cardiac_user_date, 1, 0)
        last_day = duration_validator.get_last_day(cardiac_user_date, 1, 0)
        df_daily_values_days = df_daily_values_user[df_daily_values_user[self.date_numeric_column].isin(range(first_day, last_day + 1))]

        for column, df_daily_values_column in df_daily_values_days.groupby('variable_name'):

```

```

        if column not in variable_properties.target_column_weekly_aggregation_functions:
            continue

    for daily_aggregate_function_name, df_daily_values_daily_aggregate in df_daily_values_column.groupby('daily_aggregate'):
        daily_values_dropna = df_daily_values_daily_aggregate.dropna(subset = ['value'])

        daily_values_zeros = daily_values_dropna

        if not self.allow_zeros:
            daily_values_zeros = daily_values_dropna[(daily_values_dropna['value'] < -constraints.eps) | (daily_values_dropna['value'] >
constraints.eps)]

        values = daily_values_zeros['value']
        values_size = len(values)
        sum_sizes = np.sum(daily_values_zeros['count_entries_day'])

        if values_size < minimum_available_data_ratios_weekly * duration_validator.days_in_week:
            continue

        for weekly_aggregate_function_name, weekly_aggregate_function in
variable_properties.target_column_weekly_aggregation_functions[column].items():
            value = weekly_aggregate_function(values)
            week_row = [user_id, first_day, last_day, cardiac_user_date] + [event_properties[event_column_name] for event_column_name in
event_column_names] + [1, column, daily_aggregate_function_name, weekly_aggregate_function_name, values_size, sum_sizes, value, has_event]
            week_rows.append(week_row)

    return week_rows

def get_valid_period_aggregates(self, user_id, df_cardiac_user, df_weekly_values_user, valid_periods):
    event_column_names = variable_definitions.event_target_variable_names

    period_rows = []

    for cardiac_user_date, valid_leeways_date in valid_periods.items():
        df_cardiac_event = df_cardiac_user[df_cardiac_user[self.date_numeric_column] == cardiac_user_date]
        has_event = False

```

```

# Get the event information.
event_properties_lists = dict()
event_variable_aggregates = variable_properties.event_variable_aggregates
for idx, row in df_cardiac_event.iterrows():
    has_event = True

    for event_column_name in event_column_names:
        event_properties_lists[event_column_name] = event_properties_lists.get(event_column_name, list())
        event_properties_lists[event_column_name].append(row[event_column_name])

event_properties = dict()
for event_column_name, event_column_list in event_properties_lists.items():
    aggregate = event_variable_aggregates[event_column_name]
    event_properties[event_column_name] = aggregate(event_properties_lists[event_column_name])

for event_column_name in event_column_names:
    if event_column_name not in event_properties:
        event_properties[event_column_name] = None

for leeway, valid_weeks_leeway_date in valid_leeways_date.items():
    if leeway != 0:
        continue

    for week_before_after, count_valid_weeks in valid_weeks_leeway_date.items():
        first_day = duration_validator.get_first_day(cardiac_user_date, week_before_after, leeway)
        last_day = duration_validator.get_last_day_period(cardiac_user_date, week_before_after, leeway)

        all_user_dates = range(cardiac_user_date, cardiac_user_date - 7 * week_before_after, -7)
        df_weekly_values_week = df_weekly_values_user[df_weekly_values_user['cardiac_user_date'].isin(all_user_dates)]

        for column, df_weekly_values_column in df_weekly_values_week.groupby('variable_name'):
            if column not in variable_properties.target_column_period_aggregation_functions:
                continue

            for daily_aggregate_function_name, df_weekly_values_daily_aggregate in df_weekly_values_column.groupby('daily_aggregate'):

```

```

        for weekly_aggregate_function_name, df_weekly_values_weekly_aggregate in
df_weekly_values_daily_aggregate.groupby('weekly_aggregate'):

    # Compositional case.
    if (weekly_aggregate_function_name == 'clr') and ('clr' not in column):
        continue

    # Non-compositional case.
    if (weekly_aggregate_function_name != 'clr') and ('clr' in column):
        continue

    weekly_values_dropna = df_weekly_values_weekly_aggregate.dropna(subset = ['value'])
    #weekly_values_zeros = weekly_values_dropna[(weekly_values_dropna['value'] < -constraints.eps) |
    (weekly_values_dropna['value'] > constraints.eps)]

    # Check again that there are enough weeks with nonzero values in the period.
    if weekly_values_dropna.shape[0] < 1.0 * self.minimum_available_data_ratio_period * week_before_after:
        continue

    values = weekly_values_dropna['value']
    values_size = len(values)
    sum_sizes = np.sum(weekly_values_dropna['count_entries_days'])

    for period_aggregate_function_name, period_aggregate_function in
variable_properties.target_column_period_aggregation_functions[column].items():
        try:
            value = period_aggregate_function(values)

            if not np.isnan(value):
                period_row = [user_id, first_day, last_day, cardiac_user_date] + [event_properties[event_column_name] for
event_column_name in event_column_names] + [leeway, week_before_after, column, daily_aggregate_function_name, weekly_aggregate_function_name,
period_aggregate_function_name, values_size, sum_sizes, value, has_event]
                period_rows.append(period_row)
        except:
            pass

```

```
return period_rows
```

## heart\_rate\_parser.py

```
from days_converter import days_converter
import pandas as pd
import numpy as np

class heart_rate_parser:
    def __init__(self, aggregation_functions, aggregation_minimum_sizes, aggregation_defaults, reporting_progress_count = None):
        self.aggregation_functions = aggregation_functions
        self.aggregation_minimum_sizes = aggregation_minimum_sizes
        self.aggregation_defaults = aggregation_defaults
        self.reporting_progress_count = reporting_progress_count

    def __compute_aggregate_values(self, day_values):
        aggregate_values = []

        for aggregate_function_name, aggregate_function in self.aggregation_functions.items():
            size = len(day_values)
            aggregate_value = self.aggregation_defaults[aggregate_function_name]
            minimum_size = self.aggregation_minimum_sizes[aggregate_function_name]

            if size <= 0:
                aggregate_value = np.nan
            elif size >= minimum_size:
                aggregate_value = aggregate_function(day_values)

            aggregate_values.append(aggregate_value)

        return aggregate_values

    def parse(self, file_name, id_column, group_duration_column, aggregate_interval):
        entries = []

        with open(file_name) as infile:
```

```
minute_values = []
is_first_line = True
minutes_conv = days_converter(group_duration_column)
last_user_id = None
last_interval_start = None
count = 0

for line in infile:
    if is_first_line:
        is_first_line = False
        continue

    if (self.reporting_progress_count is not None) and (count % self.reporting_progress_count == 0):
        print('Line: ' + str(count))

    split = line.split(',')
    user_id = split[1]

    timestamp = split[2]
    minute = minutes_conv.convert_to_minutes(timestamp)
    interval_start = minute // aggregate_interval

    if last_interval_start is not None and ((user_id != last_user_id) or (interval_start != last_interval_start)):
        computed_values = self.__compute_aggregate_values(minute_values)
        minute_values = []
        entries.append([last_user_id, last_interval_start * aggregate_interval] + computed_values)

    heart_rate = int(split[3])
    minute_values.append(heart_rate)
    last_user_id = user_id
    last_interval_start = interval_start

if len(minute_values) > 0:
    computed_values = self.__compute_aggregate_values(minute_values)
    entries.append([last_user_id, last_interval_start * aggregate_interval] + computed_values)
```

```
columns = [id_column, group_duration_column] + list(self.aggregation_functions.keys())
df = pd.DataFrame(entries, columns = columns)
return df
```

## main.ipynb

```
from os import path
from duration_validator import duration_validator
from data_preprocessor import data_preprocessor
from constraints import constraints
from days_converter import days_converter
from variable_definitions import variable_definitions
from variable_properties import variable_properties
from IPython.display import display

import pickle
import pandas as pd

pd.set_option('display.max_columns', None)

days_in_week = 7
hours_in_day = 24
minutes_in_hour = 60
id_column = 'PseudoId'
group_duration_column = 'MinutesNumeric'
date_numeric_column = 'DateNumeric'

# First grid search:
# drop_column_name = 'ActivityTimeTotal'

# Second and third grid search:
drop_column_name = 'ActivityTimeActive'

data_preproc = data_preprocessor(id_column, group_duration_column, date_numeric_column)
heart_rate_folder = 'data/original_data/fitbit_data'
data_preproc.preprocess_heart_rate(heart_rate_folder)
```



```
heart_rate_file_destination = heart_rate_folder + '/heart_rate_aggregate.csv'
df_heart_rate_aggregate_all = pd.read_csv(heart_rate_file_destination)
print('Heart rate users: {}'.format(df_heart_rate_aggregate_all[id_column].unique()))

sleep_file = 'data/original_data/fitbit_data/sleep_observations.csv'
df_sleep_observations_all = pd.read_csv(sleep_file)
print('Sleep users: {}'.format(df_sleep_observations_all[id_column].unique()))

steps_file = 'data/original_data/fitbit_data/steps.csv'
df_steps_observations_all = pd.read_csv(steps_file)
print('Steps users: {}'.format(df_steps_observations_all[id_column].unique()))

activity_file = 'data/original_data/fitbit_data/activity_level_observations.csv'
df_activity_observations_all = pd.read_csv(activity_file)
print('Activity users: {}'.format(df_activity_observations_all[id_column].unique()))

df_cardiac_file = 'data/original_data/cardiac_device_data/all_episodes.csv'
df_cardiac = pd.read_csv(df_cardiac_file)
days_conv = days_converter(group_duration_column)
df_cardiac = days_conv.populate_with_date(df_cardiac, 'StartTime')
event_types = constraints.event_types
df_cardiac = df_cardiac[df_cardiac['EpisodeType'].isin(event_types)]
print('Episode users: {}'.format(df_cardiac[id_column].unique()))

wearable_user_ids = data_preproc.get_wearable_user_ids(df_steps_observations_all, df_activity_observations_all, df_sleep_observations_all,
df_heart_rate_aggregate_all)
print('Wearable users: {}'.format(wearable_user_ids))

pacemaker_user_ids = data_preproc.get_pacemaker_user_ids(df_cardiac)
print('Pacemaker users: {}'.format(pacemaker_user_ids))

intersection_user_ids = data_preproc.get_intersection_user_ids(df_cardiac, df_steps_observations_all, df_activity_observations_all,
df_sleep_observations_all, df_heart_rate_aggregate_all)
print('Intersection users: {}'.format(intersection_user_ids))

union_user_ids = data_preproc.get_union_user_ids(df_cardiac, df_steps_observations_all, df_activity_observations_all, df_sleep_observations_all,
```

```
df_heart_rate_aggregate_all)
print('Union users: {}'.format(union_user_ids))
```

```
max_weeks_before_after = constraints.maximum_weeks_before_after
behaviours_aggregates = variable_properties.behaviours_aggregates
behaviour_column_names = variable_definitions.behaviour_target_variable_names

minutely_expanded_selected_file_format = 'data/derived_data/minutely_expanded_selected_user_{}_simplified.csv'
```

```
for user_id in wearable_user_ids:
    minutely_expanded_selected_file = minutely_expanded_selected_file_format.format(user_id)
    data_preproc.preprocess_user(user_id, minutely_expanded_selected_file, df_steps_observations_all, df_activity_observations_all,
df_sleep_observations_all, df_heart_rate_aggregate_all)

print('Wearable data preprocessed')
```

```
df_cardiac_table = pd.read_csv(df_cardiac_file)
df_cardiac_table.drop_duplicates([id_column, 'DeviceModel', 'DeviceType'], inplace = True)
df_cardiac_table_users = df_cardiac_table[df_cardiac_table[id_column].isin(pacemaker_user_ids)]
df_cardiac_table_selected = df_cardiac_table_users[[id_column, 'DeviceModel', 'DeviceType']]
df_cardiac_table_selected.sort_values(by = [id_column], inplace = True)
display(df_cardiac_table_selected)
```

```
rows_monitoring_period = []

interest_user_ids = [] # A list of Int, removed to protect the users
date_carry = 2616

for user_id in interest_user_ids:
    minutely_expanded_selected_file = minutely_expanded_selected_file_format.format(user_id)
    df_cardiac_user = df_cardiac[df_cardiac[id_column] == user_id]

    min_date_fitbit = None
    max_date_fitbit = None
    diff_fitbit = 0

    if path.exists(minutely_expanded_selected_file):
```

```

df_minutely_expanded_selected = pd.read_csv(minutely_expanded_selected_file)
min_date_fitbit = min(df_minutely_expanded_selected[date_numeric_column]) + date_carry
max_date_fitbit = max(df_minutely_expanded_selected[date_numeric_column]) + date_carry
diff_fitbit = max_date_fitbit - min_date_fitbit + 1

min_date_event = None
max_date_event = None
diff_event = 0

if df_cardiac_user.shape[0] > 0:
    min_date_event = min(df_cardiac_user[date_numeric_column]) + date_carry
    max_date_event = max(df_cardiac_user[date_numeric_column]) + date_carry
    diff_event = max_date_event - min_date_event + 1

if min_date_fitbit is not None:
    if min_date_event is not None:
        monitoring_period = max(max_date_fitbit, max_date_event) - min(min_date_fitbit, min_date_event) + 1
    else:
        monitoring_period = diff_fitbit
else:
    monitoring_period = diff_event

row_monitoring_period = [user_id, min_date_fitbit, max_date_fitbit, diff_fitbit, min_date_event, max_date_event, diff_event, monitoring_period]
rows_monitoring_period.append(row_monitoring_period)

df_monitoring_period = pd.DataFrame(rows_monitoring_period, columns = ['Patient ID', 'Min. date Fitbit', 'Max. date Fitbit', 'Diff. Fitbit', 'Min. date ICD', 'Max. date ICD', 'Diff. ICD', 'Monitoring period'])
display(df_monitoring_period)

```

```

compute_valid = True

```

```

df_valid_days_file_format = 'data/validation_data/valid_days_user_{}_mindaily{}_minweekly{}_minperiod{}_zeros{}_paired{}.csv'
df_valid_weeks_file_format = 'data/validation_data/valid_weeks_user_{}_mindaily{}_minweekly{}_minperiod{}_zeros{}_paired{}.csv'
df_valid_periods_file_format = 'data/validation_data/valid_periods_user_{}_mindaily{}_minweekly{}_minperiod{}_zeros{}_paired{}.csv'

```

```

if compute_valid:
    for minimum_available_data_ratio_daily_active in constraints.minimum_available_data_ratios_daily_active:

```

```

for minimum_available_data_ratio_weekly in constraints.minimum_available_data_ratios_weekly:
    for minimum_available_data_ratio_period in constraints.minimum_available_data_ratios_period:
        if minimum_available_data_ratio_weekly != minimum_available_data_ratio_period:
            continue

        for allow_zeros in constraints.allows_zeros:
            duration_val = duration_validator(date_numeric_column, drop_column_name, minimum_available_data_ratio_daily_active,
minimum_available_data_ratio_weekly, minimum_available_data_ratio_period, allow_zeros)

            for allow_no_event_participants in constraints.allows_no_event_participants:
                behaviours_aggregates = variable_properties.behaviours_aggregates

                for user_id in wearable_user_ids:
                    if user_id not in intersection_user_ids:
                        continue

                    print(f"User: {user_id}")

                    # Get the valid days.
                    df_valid_days_file = df_valid_days_file_format.format(user_id, minimum_available_data_ratio_daily_active,
minimum_available_data_ratio_weekly, minimum_available_data_ratio_period, allow_zeros, allow_no_event_participants)

                    if (not path.exists(df_valid_days_file)):
                        minutely_expanded_selected_file = minutely_expanded_selected_file_format.format(user_id)
                        df_cardiac_user = df_cardiac[df_cardiac[id_column] == user_id]
                        df_minutely_expanded_selected = pd.read_csv(minutely_expanded_selected_file)

                        df_valid_days_file = df_valid_days_file_format.format(user_id, minimum_available_data_ratio_daily_active,
minimum_available_data_ratio_weekly, minimum_available_data_ratio_period, allow_zeros, allow_no_event_participants)
                        valid_days = None
                        invalid_days = None

                        valid_days = duration_val.get_valid_days(df_minutely_expanded_selected, df_cardiac_user)

                    if not path.exists(df_valid_days_file):
                        with open(df_valid_days_file, 'wb') as f:

```

```
        pickle.dump(valid_days, f)

    # Get the valid weeks.
    df_valid_weeks_file = df_valid_weeks_file_format.format(user_id, minimum_available_data_ratio_daily_active,
minimum_available_data_ratio_weekly, minimum_available_data_ratio_period, allow_zeros, allow_no_event_participants)

    if (not path.exists(df_valid_weeks_file)):
        with open(df_valid_days_file, 'rb') as f:
            valid_days = pickle.load(f)

    valid_weeks = None
    invalid_weeks = None

    valid_weeks = duration_val.get_valid_weeks(valid_days, df_cardiac_user)

    if not path.exists(df_valid_weeks_file):
        with open(df_valid_weeks_file, 'wb') as f:
            pickle.dump(valid_weeks, f)

    # Get the valid periods.
    df_valid_periods_file = df_valid_periods_file_format.format(user_id, minimum_available_data_ratio_daily_active,
minimum_available_data_ratio_weekly, minimum_available_data_ratio_period, allow_zeros, allow_no_event_participants)

    if (not path.exists(df_valid_periods_file)):
        with open(df_valid_weeks_file, 'rb') as f:
            valid_weeks = pickle.load(f)

    valid_periods = None
    invalid_periods = None

    valid_periods = duration_val.get_valid_periods(valid_weeks, df_cardiac_user, max_weeks_before_after)

    if not path.exists(df_valid_periods_file):
        with open(df_valid_periods_file, 'wb') as f:
            pickle.dump(valid_periods, f)
```

```
df_valid_days_file_format = 'data/validation_data/valid_days_user_{}_mindaily_{}_minweekly_{}_minperiod_{}_zeros_{}_paired_{}.csv'
```

```

for minimum_available_data_ratio_daily in constraints.minimum_available_data_ratios_daily_active:
    print(f"Minimum available data ratio daily: {minimum_available_data_ratio_daily}")

    for minimum_available_data_ratio_weekly in [0.51]:
        for minimum_available_data_ratio_period in [0.51]:
            if minimum_available_data_ratio_weekly != minimum_available_data_ratio_period:
                continue

            for allow_zeros in [False]:
                duration_val = duration_validator(date_numeric_column, drop_column_name, minimum_available_data_ratio_daily,
minimum_available_data_ratio_weekly, minimum_available_data_ratio_period, allow_zeros)

                for allow_no_event_participants in [True]:
                    behaviours_aggregates = variable_properties.behaviours_aggregates

                    for user_id in sorted(wearable_user_ids):
                        valid_days = 0
                        invalid_days = 0

                        # Get the valid days.
                        df_valid_days_file = df_valid_days_file_format.format(user_id, minimum_available_data_ratio_daily,
minimum_available_data_ratio_weekly, minimum_available_data_ratio_period, allow_zeros, allow_no_event_participants)

                        with open(df_valid_days_file, 'rb') as f:
                            valid_days_map = pickle.load(f)
                            valid_days = len(valid_days_map.keys())

                        print(f'{valid_days}')

for user_id in intersection_user_ids:
    max_valid_days = float('-inf')
    min_valid_days = float('inf')

    max_valid_weeks = float('-inf')
    min_valid_weeks = float('inf')

```

```
max_valid_periods = float('-inf')
min_valid_periods = float('inf')

max_valid_days_meta = None
min_valid_days_meta = None

max_valid_weeks_meta = None
min_valid_weeks_meta = None

max_valid_periods_meta = None
min_valid_periods_meta = None

for allow_zeros in constraints.allows_zeros:
    # print('- Allow zeros: {}'.format(allow_zeros))

    for allow_no_event_participants in constraints.allows_no_event_participants:
        # print('-- Allow no event participants: {}'.format(allow_no_event_participants))

        for minimum_available_data_ratio_daily_active in constraints.minimum_available_data_ratios_daily_active:
            # print('--- Daily limit: {}'.format(minimum_available_data_ratio_daily))

            for minimum_available_data_ratio_weekly in constraints.minimum_available_data_ratios_weekly:
                # print('---- Weekly limit: {}'.format(minimum_available_data_ratio_weekly))

                for minimum_available_data_ratio_period in constraints.minimum_available_data_ratios_period:
                    if minimum_available_data_ratio_weekly != minimum_available_data_ratio_period:
                        continue

                    # print('----- Period limit: {}'.format(minimum_available_data_ratio_period))

                    valid_days_file = "data/validation_data/valid_days_user_{}_mindaily_{}_minweekly_{}_minperiod_{}_zeros_{}_paired_{}.csv"\
                        .format(user_id, minimum_available_data_ratio_daily_active, minimum_available_data_ratio_weekly,
minimum_available_data_ratio_period, allow_zeros, allow_no_event_participants)

                    with open(valid_days_file, 'rb') as f:
                        valid_days = pickle.load(f)
```

```
len_valid_days = len(valid_days.keys())

if len_valid_days > max_valid_days:
    max_valid_days = len_valid_days
    max_valid_days_meta = [allow_zeros, allow_no_event_participants, minimum_available_data_ratio_daily_active,
minimum_available_data_ratio_weekly, minimum_available_data_ratio_period]

if len_valid_days < min_valid_days:
    min_valid_days = len_valid_days
    min_valid_days_meta = [allow_zeros, allow_no_event_participants, minimum_available_data_ratio_daily_active,
minimum_available_data_ratio_weekly, minimum_available_data_ratio_period]

valid_weeks_file = "data/validation_data/valid_weeks_user_{}_mindaily_{}_minweekly_{}_minperiod_{}_zeros_{}_paired_{}.csv"\
    .format(user_id, minimum_available_data_ratio_daily_active, minimum_available_data_ratio_weekly,
minimum_available_data_ratio_period, allow_zeros, allow_no_event_participants)

with open(valid_weeks_file, 'rb') as f:
    valid_weeks = pickle.load(f)
    len_valid_weeks = len(valid_weeks.keys())

if len_valid_weeks > max_valid_weeks:
    max_valid_weeks = len_valid_weeks
    max_valid_weeks_meta = [allow_zeros, allow_no_event_participants, minimum_available_data_ratio_daily_active,
minimum_available_data_ratio_weekly, minimum_available_data_ratio_period]

if len_valid_weeks < min_valid_weeks:
    min_valid_weeks = len_valid_weeks
    min_valid_weeks_meta = [allow_zeros, allow_no_event_participants, minimum_available_data_ratio_daily_active,
minimum_available_data_ratio_weekly, minimum_available_data_ratio_period]

valid_periods_file = "data/validation_data/valid_periods_user_{}_mindaily_{}_minweekly_{}_minperiod_{}_zeros_{}_paired_{}.csv"\
    .format(user_id, minimum_available_data_ratio_daily_active, minimum_available_data_ratio_weekly,
minimum_available_data_ratio_period, allow_zeros, allow_no_event_participants)

with open(valid_periods_file, 'rb') as f:
    valid_periods = pickle.load(f)
```



```

        len_valid_periods = len(valid_periods.keys())

        if len_valid_periods > max_valid_periods:
            max_valid_periods = len_valid_periods
            max_valid_periods_meta = [allow_zeros, allow_no_event_participants, minimum_available_data_ratio_daily_active,
minimum_available_data_ratio_weekly, minimum_available_data_ratio_period]

        if len_valid_periods < min_valid_periods:
            min_valid_periods = len_valid_periods
            min_valid_periods_meta = [allow_zeros, allow_no_event_participants, minimum_available_data_ratio_daily_active,
minimum_available_data_ratio_weekly, minimum_available_data_ratio_period]

    print(f'User: {user_id}')

    print(f'Diff valid days: {max_valid_days - min_valid_days} with min {min_valid_days} and max {max_valid_days}')
    print(f'Days min meta: {min_valid_days_meta}')
    print(f'Days max meta: {max_valid_days_meta}')

    print(f'Diff valid weeks: {max_valid_weeks - min_valid_weeks} with min {min_valid_weeks} and max {max_valid_weeks}')
    print(f'Weeks min meta: {min_valid_weeks_meta}')
    print(f'Weeks max meta: {max_valid_weeks_meta}')

    print(f'Diff valid periods: {max_valid_periods - min_valid_periods} with min {min_valid_periods} and max {max_valid_periods}')
    print(f'Periods min meta: {min_valid_periods_meta}')
    print(f'Periods max meta: {max_valid_periods_meta}')

daily_values_file_name_format = 'data/validation_data/valid_daily_aggregates_user_{}_mindaily_{}_minweekly_{}_minperiod_{}_zeros_{}_paired_{}.csv'
compute_daily_values = True

if compute_daily_values:
    for minimum_available_data_ratio_daily_active in constraints.minimum_available_data_ratios_daily_active:
        for minimum_available_data_ratio_weekly in constraints.minimum_available_data_ratios_weekly:
            for minimum_available_data_ratio_period in constraints.minimum_available_data_ratios_period:
                if minimum_available_data_ratio_weekly != minimum_available_data_ratio_period:
                    continue

```

```

        for allow_zeros in constraints.allows_zeros:
            for allow_no_event_participants in constraints.allows_no_event_participants:
                for user_id in intersection_user_ids:
                    daily_values_file_name = daily_values_file_name_format.format(user_id, minimum_available_data_ratio_daily_active,
minimum_available_data_ratio_weekly, minimum_available_data_ratio_period, allow_zeros, allow_no_event_participants)

                    if path.exists(daily_values_file_name):
                        continue

                    print('Deriving the valid daily aggregates (wearable) for user: {}'.format(user_id))

                    minutely_file = minutely_expanded_selected_file_format.format(user_id)
                    df_minutely = pd.read_csv(minutely_file)

                    # Compute daily values.
                    df_valid_days_file = df_valid_days_file_format.format(user_id, minimum_available_data_ratio_daily_active,
minimum_available_data_ratio_weekly, minimum_available_data_ratio_period, allow_zeros, allow_no_event_participants)
                    valid_days = None

                    with open(df_valid_days_file, 'rb') as f:
                        valid_days = pickle.load(f)

                    day_rows_user = duration_val.get_valid_daily_aggregates(user_id, df_minutely, valid_days)
                    df_daily_values = pd.DataFrame(day_rows_user, columns = [id_column, date_numeric_column, 'variable_name', 'daily_aggregate',
'count_entries_day', 'value'])
                    df_daily_values.to_csv(daily_values_file_name)

                    print('Done aggregates for valid days')

weekly_values_file_name_format = 'data/validation_data/valid_weekly_aggregates_user_{}_mindaily_{}_minweekly_{}_minperiod_{}_zeros_{}_paired_{}.csv'
compute_weekly_aggregates = True

if compute_weekly_aggregates:
    for user_id in intersection_user_ids:
        for minimum_available_data_ratio_daily_active in constraints.minimum_available_data_ratios_daily_active:
            for minimum_available_data_ratio_weekly in constraints.minimum_available_data_ratios_weekly:
                for minimum_available_data_ratio_period in constraints.minimum_available_data_ratios_period:

```

```

        if minimum_available_data_ratio_weekly != minimum_available_data_ratio_period:
            continue

    for allow_zeros in constraints.allows_zeros:
        for allow_no_event_participants in constraints.allows_no_event_participants:
            weekly_values_file_name = weekly_values_file_name_format.format(user_id, minimum_available_data_ratio_daily_active,
minimum_available_data_ratio_weekly, minimum_available_data_ratio_period, allow_zeros, allow_no_event_participants)

            if path.exists(weekly_values_file_name):
                continue

            print('Deriving the valid weekly aggregates (wearable) for user: {}'.format(user_id))

            daily_values_file_name = daily_values_file_name_format.format(user_id, minimum_available_data_ratio_daily_active,
minimum_available_data_ratio_weekly, minimum_available_data_ratio_period, allow_zeros, allow_no_event_participants)
            df_daily_values = pd.read_csv(daily_values_file_name)

            df_cardiac_user = df_cardiac[df_cardiac[id_column] == user_id]
            df_daily_values_user = df_daily_values[df_daily_values[id_column] == user_id]
            minutely_file = minutely_expanded_selected_file_format.format(user_id)
            df_minutely = pd.read_csv(minutely_file)

            # Compute weekly values.
            df_valid_weeks_file = df_valid_weeks_file_format.format(user_id, minimum_available_data_ratio_daily_active,
minimum_available_data_ratio_weekly, minimum_available_data_ratio_period, allow_zeros, allow_no_event_participants)
            valid_weeks = None

            with open(df_valid_weeks_file, 'rb') as f:
                valid_weeks = pickle.load(f)

            week_rows_user = duration_val.get_valid_weekly_aggregates(user_id, df_cardiac_user, df_daily_values_user, valid_weeks)

            event_column_names = variable_definitions.event_target_variable_names
            df_weekly_values = pd.DataFrame(week_rows_user, columns = [id_column, 'first_day', 'last_day', 'cardiac_user_date'] +
event_column_names + ['week_before_after', 'variable_name', 'daily_aggregate', 'weekly_aggregate', 'count_entries_week', 'count_entries_days', 'value',
'has_event'])

```

```

df_weekly_values.to_csv(weekly_values_file_name)

print('Done aggregates for valid weeks')

period_values_file_name_format = 'data/validation_data/valid_period_aggregates_user_{}_mindaily_{}_minweekly_{}_minperiod_{}_zeros_{}_paired_{}.csv'
compute_period_aggregates = True

if compute_period_aggregates:
    for user_id in intersection_user_ids:
        for minimum_available_data_ratio_daily_active in constraints.minimum_available_data_ratios_daily_active:
            for minimum_available_data_ratio_weekly in constraints.minimum_available_data_ratios_weekly:
                for minimum_available_data_ratio_period in constraints.minimum_available_data_ratios_period:
                    if minimum_available_data_ratio_weekly != minimum_available_data_ratio_period:
                        continue

                    for allow_zeros in constraints.allows_zeros:
                        for allow_no_event_participants in constraints.allows_no_event_participants:
                            period_values_file_name = period_values_file_name_format.format(user_id, minimum_available_data_ratio_daily_active,
minimum_available_data_ratio_weekly, minimum_available_data_ratio_period, allow_zeros, allow_no_event_participants)

                            if path.exists(period_values_file_name):
                                continue

                            print('Deriving the valid period aggregates (wearable) for user: {}'.format(user_id))

                            weekly_values_file_name = weekly_values_file_name_format.format(user_id, minimum_available_data_ratio_daily_active,
minimum_available_data_ratio_weekly, minimum_available_data_ratio_period, allow_zeros, allow_no_event_participants)
                            df_weekly_values = pd.read_csv(weekly_values_file_name)

                            df_cardiac_user = df_cardiac[df_cardiac[id_column] == user_id]
                            df_weekly_values_user = df_weekly_values[df_weekly_values[id_column] == user_id]

                            # Compute weekly values.
                            df_valid_periods_file = df_valid_periods_file_format.format(user_id, minimum_available_data_ratio_daily_active,
minimum_available_data_ratio_weekly, minimum_available_data_ratio_period, allow_zeros, allow_no_event_participants)
                            valid_periods = None

```

```

        with open(df_valid_periods_file, 'rb') as f:
            valid_periods = pickle.load(f)

        period_rows_user = duration_val.get_valid_period_aggregates(user_id, df_cardiac_user, df_weekly_values_user, valid_periods)
        event_column_names = variable_definitions.event_target_variable_names
        df_period_values = pd.DataFrame(period_rows_user, columns = [id_column, 'first_day', 'last_day', 'cardiac_user_date'] +
event_column_names + ['leeway', 'week_before_after', 'variable_name', 'daily_aggregate', 'weekly_aggregate', 'period_aggregate', 'count_entries_period',
'count_entries_days', 'value', 'has_event'])
        df_period_values.sort_values(by = ['leeway', 'week_before_after', 'variable_name', 'daily_aggregate', 'weekly_aggregate',
'period_aggregate', id_column, 'cardiac_user_date'], ignore_index = True, inplace = True)
        df_period_values.to_csv(period_values_file_name)

    print('Done aggregates for valid periods')

```

```
import json
```

```
compute_longitudinal_sizes = True
```

```
aggregates = ['mean', 'median', 'max', 'min', 'std', 'sum']
```

```
if compute_longitudinal_sizes:
```

```
    for minimum_available_data_ratio_daily in constraints.minimum_available_data_ratios_daily_active:
```

```
        for minimum_available_data_ratio_weekly in constraints.minimum_available_data_ratios_weekly:
```

```
            for minimum_available_data_ratio_period in constraints.minimum_available_data_ratios_period:
```

```
                if minimum_available_data_ratio_weekly != minimum_available_data_ratio_period:
```

```
                    continue
```

```
            for allow_zeros in constraints.allows_zeros:
```

```
                for allow_no_event_participants in constraints.allows_no_event_participants:
```

```
                    # Mapping of: variable, period, daily, weekly, period, outcome, user:
```

```
                    mapping = dict()
```

```
                    for user_id in intersection_user_ids:
```

```
                        valid_aggregates_user_file =
```

```
'data/validation_data/valid_period_aggregates_user_{}_mindaily_{}_minweekly_{}_minperiod_{}_zeros_{}_paired_{}.csv'.format(user_id,
```

```
minimum_available_data_ratio_daily, minimum_available_data_ratio_weekly, minimum_available_data_ratio_period, allow_zeros, allow_no_event_participants)
```

```

        if not path.exists(valid_aggregates_user_file):
            continue

df_valid_periods_user = pd.read_csv(valid_aggregates_user_file)

for variable_name, df_variable in df_valid_periods_user.groupby('variable_name'):
    for period, df_period in df_variable.groupby('week_before_after'):
        for daily_aggregate, df_daily_aggregate in df_period.groupby('daily_aggregate'):
            for weekly_aggregate, df_weekly_aggregate in df_daily_aggregate.groupby('weekly_aggregate'):
                for period_aggregate, df_period_aggregate in df_weekly_aggregate.groupby('period_aggregate'):
                    for has_event, df_event in df_period_aggregate.groupby('has_event'):
                        if df_event.shape[0] <= 0:
                            continue

                        mapping[variable_name] = mapping.get(variable_name, dict())
                        mapping[variable_name][period] = mapping[variable_name].get(period, dict())
                        mapping[variable_name][period][daily_aggregate] = mapping[variable_name][period].get(daily_aggregate,
dict())

                        mapping[variable_name][period][daily_aggregate][weekly_aggregate] =
mapping[variable_name][period][daily_aggregate].get(weekly_aggregate, dict())
                        mapping[variable_name][period][daily_aggregate][weekly_aggregate][period_aggregate] =
mapping[variable_name][period][daily_aggregate][weekly_aggregate].get(period_aggregate, dict())
                        mapping[variable_name][period][daily_aggregate][weekly_aggregate][period_aggregate][str(has_event)] =
mapping[variable_name][period][daily_aggregate][weekly_aggregate][period_aggregate].get(str(has_event), dict())

mapping[variable_name][period][daily_aggregate][weekly_aggregate][period_aggregate][str(has_event)][str(user_id)] = df_event.shape[0]

    print(json.dumps(mapping, indent=4, sort_keys=True))

```

```
import math
```

```
compute_dataset = True
```

```
dataset_file_name_flavour_format =
```

```
'data/result_data/dataset_{}_period_{}_behaviour_{}_daily_{}_weekly_{}_period_{}_mindaily_{}_minweekly_{}_minperiod_{}_zeros_{}_paired_{}.csv'
```

```
if compute_dataset:
```

```

for minimum_available_data_ratio_daily_active in constraints.minimum_available_data_ratios_daily_active:
    for minimum_available_data_ratio_weekly in constraints.minimum_available_data_ratios_weekly:
        for minimum_available_data_ratio_period in constraints.minimum_available_data_ratios_period:
            if minimum_available_data_ratio_weekly != minimum_available_data_ratio_period:
                continue

        for allow_zeros in constraints.allows_zeros:
            for allow_no_event_participants in constraints.allows_no_event_participants:
                dfs = dict()

                for user_id in intersection_user_ids:
                    valid_aggregates_user_file =
'data/validation_data/valid_period_aggregates_user_{}_mindaily_{}_minweekly_{}_minperiod_{}_zeros_{}_paired_{}.csv'.format(user_id,
minimum_available_data_ratio_daily_active, minimum_available_data_ratio_weekly, minimum_available_data_ratio_period, allow_zeros,
allow_no_event_participants)

                    if not path.exists(valid_aggregates_user_file):
                        continue

                print('User: {}'.format(user_id))
                df_valid_periods_user = pd.read_csv(valid_aggregates_user_file)

                for behaviour, df_valid_periods_behaviour in df_valid_periods_user.groupby('variable_name'):
                    if behaviour not in variable_definitions.logit_behaviour_target_variable_names:
                        continue

                print('Behaviour: {}'.format(behaviour))
                dfs[behaviour] = dfs.get(behaviour, dict())

                for period_duration, df_valid_periods_after in df_valid_periods_behaviour.groupby('week_before_after'):
                    if period_duration not in range(1, 1 + constraints.maximum_weeks_before_after):
                        continue

                    for daily_aggregate, df_valid_periods_day_aggregate in df_valid_periods_after.groupby('daily_aggregate'):
                        print('Daily aggregate: {}'.format(daily_aggregate))

```

```

dfs[behaviour][daily_aggregate] = dfs[behaviour].get(daily_aggregate, dict())

for weekly_aggregate, df_valid_periods_week_aggregate in
df_valid_periods_day_aggregate.groupby('weekly_aggregate'):
    print('Weekly aggregate: {}'.format(weekly_aggregate))

    dfs[behaviour][daily_aggregate][weekly_aggregate] = dfs[behaviour][daily_aggregate].get(weekly_aggregate,
dict())

    for period_aggregate, df_valid_periods_duration in
df_valid_periods_week_aggregate.groupby('period_aggregate'):
        print('Period aggregate: {}'.format(period_aggregate))

        dfs[behaviour][daily_aggregate][weekly_aggregate][period_aggregate] =
dfs[behaviour][daily_aggregate][weekly_aggregate].get(period_aggregate, dict())

        if df_valid_periods_duration.shape[0] <= 0:
            continue

        df_valid_periods_positive_user = df_valid_periods_duration[df_valid_periods_duration['has_event'] == True]
        df_valid_periods_negative_user = df_valid_periods_duration[df_valid_periods_duration['has_event'] ==
False]

        if not allow_no_event_participants:
            if df_valid_periods_positive_user.shape[0] <= 0 or df_valid_periods_negative_user.shape[0] <= 0:
                continue

        pd.set_option('mode.chained_assignment', None)
        print('Period duration: {}'.format(period_duration))

        df_valid_periods_duration['original_date'] = df_valid_periods_duration.apply(lambda row:
days_converter.get_date(row['cardiac_user_date']), axis = 1)
        df_valid_periods_duration['week_day'] = df_valid_periods_duration.apply(lambda row:
row['original_date'].isoweekday() , axis = 1)
        df_valid_periods_duration['week_day_1'] = df_valid_periods_duration.apply(lambda row: row['week_day'] ==
1, axis = 1)

```



```

2, axis = 1)
3, axis = 1)
4, axis = 1)
5, axis = 1)
6, axis = 1)
7, axis = 1)

df_valid_periods_duration['week_day_2'] = df_valid_periods_duration.apply(lambda row: row['week_day'] ==
row['week_day'] and row['week_day'] <= 5 else 0, axis = 1)
df_valid_periods_duration['week_day_3'] = df_valid_periods_duration.apply(lambda row: row['week_day'] ==
row['week_day'] and row['week_day'] <= 7 else 0, axis = 1)
df_valid_periods_duration['week_day_4'] = df_valid_periods_duration.apply(lambda row: row['week_day'] ==
row['week_day'] and row['week_day'] <= 7 else 0, axis = 1)
df_valid_periods_duration['week_day_5'] = df_valid_periods_duration.apply(lambda row: row['week_day'] ==
row['week_day'] and row['week_day'] <= 7 else 0, axis = 1)
df_valid_periods_duration['week_day_6'] = df_valid_periods_duration.apply(lambda row: row['week_day'] ==
row['week_day'] and row['week_day'] <= 7 else 0, axis = 1)
df_valid_periods_duration['week_day_7'] = df_valid_periods_duration.apply(lambda row: row['week_day'] ==
row['week_day'] and row['week_day'] <= 7 else 0, axis = 1)
df_valid_periods_duration['week_day_working_day'] = df_valid_periods_duration.apply(lambda row: 1 if 1 <=
row['week_day'] and row['week_day'] <= 5 else 0, axis = 1)
df_valid_periods_duration['week_day_weekend_day'] = df_valid_periods_duration.apply(lambda row: 1 if 6 <=
row['week_day'] and row['week_day'] <= 7 else 0, axis = 1)
df_valid_periods_duration['leap_year_bit'] = df_valid_periods_duration.apply(lambda row: 1 if
((row['original_date'].year % 400 == 0) or (row['original_date'].year % 100 != 0) and (row['original_date'].year % 4 == 0)) else 0, axis = 1)
df_valid_periods_duration['original_year'] = df_valid_periods_duration.apply(lambda row:
row['original_date'].year, axis = 1)
df_valid_periods_duration['original_month'] = df_valid_periods_duration.apply(lambda row:
row['original_date'].month, axis = 1)
df_valid_periods_duration['month_1'] = df_valid_periods_duration.apply(lambda row: 1 if
(row['original_month'] == 1) else 0, axis = 1)
df_valid_periods_duration['month_2'] = df_valid_periods_duration.apply(lambda row: 1 if
(row['original_month'] == 2) else 0, axis = 1)
df_valid_periods_duration['month_3'] = df_valid_periods_duration.apply(lambda row: 1 if
(row['original_month'] == 3) else 0, axis = 1)
df_valid_periods_duration['month_4'] = df_valid_periods_duration.apply(lambda row: 1 if
(row['original_month'] == 4) else 0, axis = 1)
df_valid_periods_duration['month_5'] = df_valid_periods_duration.apply(lambda row: 1 if
(row['original_month'] == 5) else 0, axis = 1)
df_valid_periods_duration['month_6'] = df_valid_periods_duration.apply(lambda row: 1 if
(row['original_month'] == 6) else 0, axis = 1)
df_valid_periods_duration['month_7'] = df_valid_periods_duration.apply(lambda row: 1 if
(row['original_month'] == 7) else 0, axis = 1)

```

```

df_valid_periods_duration['month_8'] = df_valid_periods_duration.apply(lambda row: 1 if
(row['original_month'] == 8) else 0, axis = 1)
df_valid_periods_duration['month_9'] = df_valid_periods_duration.apply(lambda row: 1 if
(row['original_month'] == 9) else 0, axis = 1)
df_valid_periods_duration['month_10'] = df_valid_periods_duration.apply(lambda row: 1 if
(row['original_month'] == 10) else 0, axis = 1)
df_valid_periods_duration['month_11'] = df_valid_periods_duration.apply(lambda row: 1 if
(row['original_month'] == 11) else 0, axis = 1)
df_valid_periods_duration['month_12'] = df_valid_periods_duration.apply(lambda row: 1 if
(row['original_month'] == 12) else 0, axis = 1)

for diff_year in range(2018, 2021):
    for diff_month in range(1, 13):
        def month_diff(this_year, this_month, reference_year, reference_month):
            return (this_year - reference_year) * 12 + this_month - reference_month

        index = (diff_year - 2018) * 12 + diff_month
        index_str = 'month_{}_normal'.format(index)
        df_valid_periods_duration[index_str] = df_valid_periods_duration.apply(lambda row: math.pow(0.5,
abs(month_diff(row['original_year'], row['original_month'], diff_year, diff_month)) * 1.0), axis = 1)

df_valid_periods_duration['season_winter'] = df_valid_periods_duration.apply(lambda row: 1 if (12 <=
row['original_month'] or row['original_month'] < 3) else 0, axis = 1)
df_valid_periods_duration['season_spring'] = df_valid_periods_duration.apply(lambda row: 1 if (3 <=
row['original_month'] and row['original_month'] < 6) else 0, axis = 1)
df_valid_periods_duration['season_summer'] = df_valid_periods_duration.apply(lambda row: 1 if (6 <=
row['original_month'] and row['original_month'] < 9) else 0, axis = 1)
df_valid_periods_duration['season_fall'] = df_valid_periods_duration.apply(lambda row: 1 if (9 <=
row['original_month'] and row['original_month'] < 12) else 0, axis = 1)
df_valid_periods_duration['season'] = df_valid_periods_duration.apply(lambda row: row['season_winter'] + 2
* row['season_spring'] + 3 * row['season_summer'] + 4 * row['season_fall'], axis = 1)
df_valid_periods_duration['year_2018'] = df_valid_periods_duration.apply(lambda row: 1 if
(row['original_year'] == 2018) else 0, axis = 1)
df_valid_periods_duration['year_2019'] = df_valid_periods_duration.apply(lambda row: 1 if
(row['original_year'] == 2019) else 0, axis = 1)
df_valid_periods_duration['year_2020'] = df_valid_periods_duration.apply(lambda row: 1 if

```

```

(row['original_year'] == 2020) else 0, axis = 1)
        df_valid_periods_duration['day_of_year'] = df_valid_periods_duration.apply(lambda row:
row['original_date'].timetuple().tm_yday, axis = 1)
        df_valid_periods_duration['week_of_year'] = df_valid_periods_duration.apply(lambda row: row['day_of_year']
// 7, axis = 1)
        df_valid_periods_duration['month_of_year'] = df_valid_periods_duration.apply(lambda row:
row['original_date'].month, axis = 1)

        df_valid_periods_duration['value_{}'.format(behaviour)] = df_valid_periods_duration['value']

        df_final = dfs[behaviour][daily_aggregate][weekly_aggregate][period_aggregate].get(period_duration, None)

        if df_final is None:
            df_final = df_valid_periods_duration
        else:
            df_final = pd.concat([df_final, df_valid_periods_duration])

        dfs[behaviour][daily_aggregate][weekly_aggregate][period_aggregate][period_duration] = df_final

for behaviour in variable_definitions.logit_behaviour_target_variable_names:
    if behaviour not in dfs:
        continue

    print('Behaviour: {}'.format(behaviour))

    for daily_aggregate in aggregates:
        if daily_aggregate not in dfs[behaviour]:
            continue

        print('Daily aggregate: {}'.format(daily_aggregate))

        for weekly_aggregate in aggregates:
            if weekly_aggregate not in dfs[behaviour][daily_aggregate]:
                continue

            print('Weekly aggregate: {}'.format(weekly_aggregate))

```

```

for period_aggregate in aggregates:
    if period_aggregate not in dfs[behaviour][daily_aggregate][weekly_aggregate]:
        continue

    print('Period aggregate: {}'.format(period_aggregate))

    df_combined = dict()

    for period_duration in range(1, 1 + constraints.maximum_weeks_before_after):
        if period_duration not in dfs[behaviour][daily_aggregate][weekly_aggregate][period_aggregate]:
            continue

        print('Period duration: {}'.format(period_duration))
        df = dfs[behaviour][daily_aggregate][weekly_aggregate][period_aggregate][period_duration]

        for other_period_duration in range(period_duration, 1 + constraints.maximum_weeks_before_after):
            df_combined_other = df_combined.get(other_period_duration, None)

            if df_combined_other is None:
                df_combined_other = df
            else:
                df_combined_other = pd.concat([df_combined_other, df])

            df_combined[other_period_duration] = df_combined_other

        dataset_file_name = dataset_file_name_flavour_format.format('separate', period_duration, behaviour,
daily_aggregate, weekly_aggregate, period_aggregate, minimum_available_data_ratio_daily_active, minimum_available_data_ratio_weekly,
minimum_available_data_ratio_period, allow_zeros, allow_no_event_participants)

        if not path.exists(dataset_file_name):
            df.to_csv(dataset_file_name)

    for other_period_duration in range(1, 1 + constraints.maximum_weeks_before_after):
        if other_period_duration not in df_combined:
            continue

```

```
dataset_combined_file_name = dataset_file_name_flavour_format.format('cumulative', other_period_duration,
behaviour, daily_aggregate, weekly_aggregate, period_aggregate, minimum_available_data_ratio_daily_active, minimum_available_data_ratio_weekly,
minimum_available_data_ratio_period, allow_zeros, allow_no_event_participants)

if not path.exists(dataset_combined_file_name):
    df_combined[other_period_duration].to_csv(dataset_combined_file_name)
```

## sleep\_parser.py

```
import pandas as pd

class sleep_parser:
    seconds_in_minute = 60
    other_periodicity = 15

    @staticmethod
    def parse(df, id_column, minutes_column, sleep_stage_column, duration_column):

        # User ID, minute, sleep stage (true)
        mapping = dict()
        user_groups = df.groupby(id_column)

        for user_id, user_group in user_groups:
            mapping[user_id] = mapping.get(user_id, dict())
            minutes_groups = user_group.groupby(minutes_column)

            for minutes_start, minutes_group in minutes_groups:
                for idx, row in minutes_group.iterrows():
                    duration = row[duration_column]
                    sleep_stage_id = row[sleep_stage_column]
                    minutes_end = minutes_start + (duration // sleep_parser.seconds_in_minute)

                    for minutes_numeric in range(minutes_start, minutes_end):
                        minutes_numeric_div = (minutes_numeric // sleep_parser.other_periodicity) * sleep_parser.other_periodicity
                        mapping[user_id][minutes_numeric_div] = mapping[user_id].get(minutes_numeric_div, dict())
```

```

        mapping[user_id][minutes_numeric_div][sleep_stage_id] = mapping[user_id][minutes_numeric_div].get(sleep_stage_id, 0)
        mapping[user_id][minutes_numeric_div][sleep_stage_id] = 1 + mapping[user_id][minutes_numeric_div][sleep_stage_id]

        # Check to not have more of the stage filled than available minutes.
        assert mapping[user_id][minutes_numeric_div][sleep_stage_id] <= sleep_parser.other_periodicity

sleep_stage_ids = df[sleep_stage_column].unique()
entries = []

for user_id, user_group in mapping.items():
    for minute_numeric, sleep_stage_ids_group in user_group.items():
        entry = [user_id, minute_numeric]
        sum = 0

        for sleep_stage_id in sleep_stage_ids:
            if sleep_stage_id in sleep_stage_ids_group:
                value = sleep_stage_ids_group[sleep_stage_id]
                entry.append(value)
                sum += value
            else:
                entry.append(0)

        # Check to not have more stages filled than available minutes.
        assert sum <= sleep_parser.other_periodicity

        entries.append(entry)

sleep_stage_columns = ['{}_{}'.format(sleep_stage_column, sleep_stage_id) for sleep_stage_id in sleep_stage_ids]
df_parsed = pd.DataFrame(entries, columns = [id_column, minutes_column] + sleep_stage_columns)
return df_parsed

```

## variable\_definitions.py

```

import numpy as np

class variable_definitions:

```

```
behaviour_target_variable_names = [  
    'StepsCount',  
  
    'ActivityTimeSedentary',  
    'ActivityTimeLight',  
    'ActivityTimeFair',  
    'ActivityTimeVigorous',  
    'ActivityTimeSedentaryLight',  
    'ActivityTimeLightFair',  
    'ActivityTimeFairVigorous',  
    'ActivityTimeActive',  
    'ActivityTimeTotal',  
  
    'SleepTimeAsleep',  
    'SleepTimeAwake',  
    'SleepTimeRestless',  
    'SleepTimeAsleepAwake',  
    'SleepTimeAwakeRestless',  
    'SleepTimeAsleepRestless',  
    'SleepTimeTotal',  
    'SleepTimeTotalKnown',  
  
    'ActivityTimeSedentaryAwake',  
    'ActivityTimeSedentaryLightAwake',  
  
    'HeartRateMeanSedentary',  
    'HeartRateMedianSedentary',  
    'HeartRateMinSedentary',  
    'HeartRateMaxSedentary',  
    'HeartRateStdevSedentary',  
  
    'HeartRateMeanSedentaryAwake',  
    'HeartRateMedianSedentaryAwake',  
    'HeartRateMinSedentaryAwake',  
    'HeartRateMaxSedentaryAwake',  
    'HeartRateStdevSedentaryAwake',
```

```
'HeartRateMeanLight',
'HeartRateMedianLight',
'HeartRateMinLight',
'HeartRateMaxLight',
'HeartRateStdevLight',

'HeartRateMeanFair',
'HeartRateMedianFair',
'HeartRateMinFair',
'HeartRateMaxFair',
'HeartRateStdevFair',

'HeartRateMeanVigorous',
'HeartRateMedianVigorous',
'HeartRateMinVigorous',
'HeartRateMaxVigorous',
'HeartRateStdevVigorous',

'HeartRateMeanSedentaryLight',
'HeartRateMedianSedentaryLight',
'HeartRateMinSedentaryLight',
'HeartRateMaxSedentaryLight',
'HeartRateStdevSedentaryLight',

'HeartRateMeanSedentaryLightAwake',
'HeartRateMedianSedentaryLightAwake',
'HeartRateMinSedentaryLightAwake',
'HeartRateMaxSedentaryLightAwake',
'HeartRateStdevSedentaryLightAwake',

'HeartRateMeanLightFair',
'HeartRateMedianLightFair',
'HeartRateMinLightFair',
'HeartRateMaxLightFair',
'HeartRateStdevLightFair',
```



```
'HeartRateMeanFairVigorous',  
'HeartRateMedianFairVigorous',  
'HeartRateMinFairVigorous',  
'HeartRateMaxFairVigorous',  
'HeartRateStdevFairVigorous',
```

```
'HeartRateMeanActive',  
'HeartRateMedianActive',  
'HeartRateMinActive',  
'HeartRateMaxActive',  
'HeartRateStdevActive',
```

```
'HeartRateMeanAsleep',  
'HeartRateMedianAsleep',  
'HeartRateMinAsleep',  
'HeartRateMaxAsleep',  
'HeartRateStdevAsleep',
```

```
'HeartRateMeanAwake',  
'HeartRateMedianAwake',  
'HeartRateMinAwake',  
'HeartRateMaxAwake',  
'HeartRateStdevAwake',
```

```
'HeartRateMeanRestless',  
'HeartRateMedianRestless',  
'HeartRateMinRestless',  
'HeartRateMaxRestless',  
'HeartRateStdevRestless',
```

```
'HeartRateMeanAsleepAwake',  
'HeartRateMedianAsleepAwake',  
'HeartRateMinAsleepAwake',  
'HeartRateMaxAsleepAwake',  
'HeartRateStdevAsleepAwake',
```

```
'HeartRateMeanAwakeRestless',  
'HeartRateMedianAwakeRestless',  
'HeartRateMinAwakeRestless',  
'HeartRateMaxAwakeRestless',  
'HeartRateStdevAwakeRestless',
```

```
'HeartRateMeanAsleepRestless',  
'HeartRateMedianAsleepRestless',  
'HeartRateMinAsleepRestless',  
'HeartRateMaxAsleepRestless',  
'HeartRateStdevAsleepRestless',
```

```
'HeartRateMeanSleeping',  
'HeartRateMedianSleeping',  
'HeartRateMinSleeping',  
'HeartRateMaxSleeping',  
'HeartRateStdevSleeping',
```

```
'HeartRateMean',  
'HeartRateMedian',  
'HeartRateMin',  
'HeartRateMax',  
'HeartRateStdev',
```

```
'''  
'SleepTimeAsleep',  
'SleepTimeAwake',  
'SleepTimeRestless',  
'SleepTimeAsleepAwake',  
'SleepTimeAwakeRestless',  
'SleepTimeAsleepRestless',  
'SleepTimeTotal',  
'SleepTimeTotalKnown',  
'''
```

```
]
```

```
event_target_variable_names = [
    'AverageVentricularRate',
    'MaximumVentricularRate',
    'Duration'
]

logit_behaviour_target_variable_names = [
    '#StepsCount',
    '#ActivityTimeSedentaryAwake',
    '#ActivityTimeSedentaryLightAwake',
    '#ActivityTimeLight',
    '#ActivityTimeLightFair',
    '#ActivityTimeFair',
    '#ActivityTimeFairVigorous',
    '#ActivityTimeVigorous',
    'SleepTimeAsleep',
    'SleepTimeAwake',
    'SleepTimeRestless',
    'SleepTimeAsleepAwake',
    'SleepTimeAwakeRestless',
    'SleepTimeAsleepRestless',
    '#SleepTimeTotal',
    '#HeartRateMean',
    '#HeartRateMedian',
    '#HeartRateMin',
    '#HeartRateMax',
    '#HeartRateStdev'
]

definitions = [
    {
        'ActivityTimeTotal': lambda row, data_frequency_minutes: variable_definitions.calculate_union_frequency(row, ['ActivityLevel_Id__1',
'ActivityLevel_Id__2', 'ActivityLevel_Id__3', 'ActivityLevel_Id__4'], data_frequency_minutes),

        'ActivityTimeSedentary': lambda row, data_frequency_minutes: variable_definitions.calculate_union_frequency(row, ['ActivityLevel_Id__1'],
```

```
data_frequency_minutes),

    'ActivityTimeLight': lambda row, data_frequency_minutes: variable_definitions.calculate_union_frequency(row, ['ActivityLevel_Id__2'],
data_frequency_minutes),

    'ActivityTimeFair': lambda row, data_frequency_minutes: variable_definitions.calculate_union_frequency(row, ['ActivityLevel_Id__3'],
data_frequency_minutes),

    'ActivityTimeVigorous': lambda row, data_frequency_minutes: variable_definitions.calculate_union_frequency(row, ['ActivityLevel_Id__4'],
data_frequency_minutes),

    'ActivityTimeSedentaryLight': lambda row, data_frequency_minutes: variable_definitions.calculate_union_frequency(row, ['ActivityLevel_Id__1',
'ActivityLevel_Id__2'], data_frequency_minutes),

    'ActivityTimeLightFair': lambda row, data_frequency_minutes: variable_definitions.calculate_union_frequency(row, ['ActivityLevel_Id__2',
'ActivityLevel_Id__3'], data_frequency_minutes),

    'ActivityTimeFairVigorous': lambda row, data_frequency_minutes: variable_definitions.calculate_union_frequency(row, ['ActivityLevel_Id__3',
'ActivityLevel_Id__4'], data_frequency_minutes),

    'ActivityTimeActive': lambda row, data_frequency_minutes: variable_definitions.calculate_union_frequency(row, ['ActivityLevel_Id__2',
'ActivityLevel_Id__3', 'ActivityLevel_Id__4'], data_frequency_minutes),

    'SleepTimeAsleep': lambda row, data_frequency_minutes: variable_definitions.calculate_union(row, ['SleepStage_Id__0']),

    'SleepTimeAwake': lambda row, data_frequency_minutes: variable_definitions.calculate_union(row, ['SleepStage_Id__1']),

    'SleepTimeRestless': lambda row, data_frequency_minutes: variable_definitions.calculate_union(row, ['SleepStage_Id__2']),

    'SleepTimeAsleepAwake': lambda row, data_frequency_minutes: variable_definitions.calculate_union(row, ['SleepStage_Id__0',
'SleepStage_Id__1']),

    'SleepTimeAwakeRestless': lambda row, data_frequency_minutes: variable_definitions.calculate_union(row, ['SleepStage_Id__1',
'SleepStage_Id__2']),

    'SleepTimeAsleepRestless': lambda row, data_frequency_minutes: variable_definitions.calculate_union(row, ['SleepStage_Id__0',
```

```

'SleepStage_Id__2']],

    'SleepTimeTotalKnown': lambda row, data_frequency_minutes: variable_definitions.calculate_union(row, ['SleepStage_Id__0', 'SleepStage_Id__1',
'SleepStage_Id__2']],

    'SleepTimeTotal': lambda row, data_frequency_minutes: variable_definitions.calculate_union(row, ['SleepStage_Id__0', 'SleepStage_Id__1',
'SleepStage_Id__2', 'SleepStage_Id__8'])
},
{
    'DailyTimeTotal': lambda row, data_frequency_minutes: variable_definitions.calculate_union(row, ['SleepTimeTotal', 'ActivityTimeTotal']),

    'ActivityTimeSedentaryAwake': lambda row, data_frequency_minutes: max(0, row['ActivityTimeSedentary'] - row['SleepTimeTotal']),

    'ActivityTimeSedentaryLightAwake': lambda row, data_frequency_minutes: max(0, row['ActivityTimeSedentaryLight'] - row['SleepTimeTotal']),
},
{
    'HeartRateMeanSedentary': lambda row, data_frequency_minutes: variable_definitions.calculate_union_conditional(row, ['HeartRateMean'],
'ActivityTimeSedentary'),
    'HeartRateMedianSedentary': lambda row, data_frequency_minutes: variable_definitions.calculate_union_conditional(row, ['HeartRateMedian'],
'ActivityTimeSedentary'),
    'HeartRateMinSedentary': lambda row, data_frequency_minutes: variable_definitions.calculate_union_conditional(row, ['HeartRateMin'],
'ActivityTimeSedentary'),
    'HeartRateMaxSedentary': lambda row, data_frequency_minutes: variable_definitions.calculate_union_conditional(row, ['HeartRateMax'],
'ActivityTimeSedentary'),
    'HeartRateStdevSedentary': lambda row, data_frequency_minutes: variable_definitions.calculate_union_conditional(row, ['HeartRateStdev'],
'ActivityTimeSedentary'),

    'HeartRateMeanSedentaryAwake': lambda row, data_frequency_minutes: variable_definitions.calculate_union_conditional(row, ['HeartRateMean'],
'ActivityTimeSedentaryAwake'),
    'HeartRateMedianSedentaryAwake': lambda row, data_frequency_minutes: variable_definitions.calculate_union_conditional(row,
['HeartRateMedian'], 'ActivityTimeSedentaryAwake'),
    'HeartRateMinSedentaryAwake': lambda row, data_frequency_minutes: variable_definitions.calculate_union_conditional(row, ['HeartRateMin'],
'ActivityTimeSedentaryAwake'),
    'HeartRateMaxSedentaryAwake': lambda row, data_frequency_minutes: variable_definitions.calculate_union_conditional(row, ['HeartRateMax'],
'ActivityTimeSedentaryAwake'),
    'HeartRateStdevSedentaryAwake': lambda row, data_frequency_minutes: variable_definitions.calculate_union_conditional(row, ['HeartRateStdev'],

```

```
'ActivityTimeSedentaryAwake'),

    'HeartRateMeanLight': lambda row, data_frequency_minutes: variable_definitions.calculate_union_conditional(row, ['HeartRateMean'],
'ActivityTimeLight'),
    'HeartRateMedianLight': lambda row, data_frequency_minutes: variable_definitions.calculate_union_conditional(row, ['HeartRateMedian'],
'ActivityTimeLight'),
    'HeartRateMinLight': lambda row, data_frequency_minutes: variable_definitions.calculate_union_conditional(row, ['HeartRateMin'],
'ActivityTimeLight'),
    'HeartRateMaxLight': lambda row, data_frequency_minutes: variable_definitions.calculate_union_conditional(row, ['HeartRateMax'],
'ActivityTimeLight'),
    'HeartRateStdevLight': lambda row, data_frequency_minutes: variable_definitions.calculate_union_conditional(row, ['HeartRateStdev'],
'ActivityTimeLight'),

    'HeartRateMeanFair': lambda row, data_frequency_minutes: variable_definitions.calculate_union_conditional(row, ['HeartRateMean'],
'ActivityTimeFair'),
    'HeartRateMedianFair': lambda row, data_frequency_minutes: variable_definitions.calculate_union_conditional(row, ['HeartRateMedian'],
'ActivityTimeFair'),
    'HeartRateMinFair': lambda row, data_frequency_minutes: variable_definitions.calculate_union_conditional(row, ['HeartRateMin'],
'ActivityTimeFair'),
    'HeartRateMaxFair': lambda row, data_frequency_minutes: variable_definitions.calculate_union_conditional(row, ['HeartRateMax'],
'ActivityTimeFair'),
    'HeartRateStdevFair': lambda row, data_frequency_minutes: variable_definitions.calculate_union_conditional(row, ['HeartRateStdev'],
'ActivityTimeFair'),

    'HeartRateMeanVigorous': lambda row, data_frequency_minutes: variable_definitions.calculate_union_conditional(row, ['HeartRateMean'],
'ActivityTimeVigorous'),
    'HeartRateMedianVigorous': lambda row, data_frequency_minutes: variable_definitions.calculate_union_conditional(row, ['HeartRateMedian'],
'ActivityTimeVigorous'),
    'HeartRateMinVigorous': lambda row, data_frequency_minutes: variable_definitions.calculate_union_conditional(row, ['HeartRateMin'],
'ActivityTimeVigorous'),
    'HeartRateMaxVigorous': lambda row, data_frequency_minutes: variable_definitions.calculate_union_conditional(row, ['HeartRateMax'],
'ActivityTimeVigorous'),
    'HeartRateStdevVigorous': lambda row, data_frequency_minutes: variable_definitions.calculate_union_conditional(row, ['HeartRateStdev'],
'ActivityTimeVigorous'),

    'HeartRateMeanSedentaryLight': lambda row, data_frequency_minutes: variable_definitions.calculate_union_conditional(row, ['HeartRateMean'],
```

```
'ActivityTimeSedentaryLight'),
    'HeartRateMedianSedentaryLight': lambda row, data_frequency_minutes: variable_definitions.calculate_union_conditional(row,
['HeartRateMedian'], 'ActivityTimeSedentaryLight'),
    'HeartRateMinSedentaryLight': lambda row, data_frequency_minutes: variable_definitions.calculate_union_conditional(row, ['HeartRateMin'],
'ActivityTimeSedentaryLight'),
    'HeartRateMaxSedentaryLight': lambda row, data_frequency_minutes: variable_definitions.calculate_union_conditional(row, ['HeartRateMax'],
'ActivityTimeSedentaryLight'),
    'HeartRateStdevSedentaryLight': lambda row, data_frequency_minutes: variable_definitions.calculate_union_conditional(row, ['HeartRateStdev'],
'ActivityTimeSedentaryLight'),

    'HeartRateMeanSedentaryLightAwake': lambda row, data_frequency_minutes: variable_definitions.calculate_union_conditional(row,
['HeartRateMean'], 'ActivityTimeSedentaryLightAwake'),
    'HeartRateMedianSedentaryLightAwake': lambda row, data_frequency_minutes: variable_definitions.calculate_union_conditional(row,
['HeartRateMedian'], 'ActivityTimeSedentaryLightAwake'),
    'HeartRateMinSedentaryLightAwake': lambda row, data_frequency_minutes: variable_definitions.calculate_union_conditional(row, ['HeartRateMin'],
'ActivityTimeSedentaryLightAwake'),
    'HeartRateMaxSedentaryLightAwake': lambda row, data_frequency_minutes: variable_definitions.calculate_union_conditional(row, ['HeartRateMax'],
'ActivityTimeSedentaryLightAwake'),
    'HeartRateStdevSedentaryLightAwake': lambda row, data_frequency_minutes: variable_definitions.calculate_union_conditional(row,
['HeartRateStdev'], 'ActivityTimeSedentaryLightAwake'),

    'HeartRateMeanLightFair': lambda row, data_frequency_minutes: variable_definitions.calculate_union_conditional(row, ['HeartRateMean'],
'ActivityTimeLightFair'),
    'HeartRateMedianLightFair': lambda row, data_frequency_minutes: variable_definitions.calculate_union_conditional(row, ['HeartRateMedian'],
'ActivityTimeLightFair'),
    'HeartRateMinLightFair': lambda row, data_frequency_minutes: variable_definitions.calculate_union_conditional(row, ['HeartRateMin'],
'ActivityTimeLightFair'),
    'HeartRateMaxLightFair': lambda row, data_frequency_minutes: variable_definitions.calculate_union_conditional(row, ['HeartRateMax'],
'ActivityTimeLightFair'),
    'HeartRateStdevLightFair': lambda row, data_frequency_minutes: variable_definitions.calculate_union_conditional(row, ['HeartRateStdev'],
'ActivityTimeLightFair'),

    'HeartRateMeanFairVigorous': lambda row, data_frequency_minutes: variable_definitions.calculate_union_conditional(row, ['HeartRateMean'],
'ActivityTimeFairVigorous'),
    'HeartRateMedianFairVigorous': lambda row, data_frequency_minutes: variable_definitions.calculate_union_conditional(row, ['HeartRateMedian'],
'ActivityTimeFairVigorous'),
```

```
        'HeartRateMinFairVigorous': lambda row, data_frequency_minutes: variable_definitions.calculate_union_conditional(row, ['HeartRateMin'],
'ActivityTimeFairVigorous'),
        'HeartRateMaxFairVigorous': lambda row, data_frequency_minutes: variable_definitions.calculate_union_conditional(row, ['HeartRateMax'],
'ActivityTimeFairVigorous'),
        'HeartRateStdevFairVigorous': lambda row, data_frequency_minutes: variable_definitions.calculate_union_conditional(row, ['HeartRateStdev'],
'ActivityTimeFairVigorous'),

        'HeartRateMeanActive': lambda row, data_frequency_minutes: variable_definitions.calculate_union_conditional(row, ['HeartRateMean'],
'ActivityTimeActive'),
        'HeartRateMedianActive': lambda row, data_frequency_minutes: variable_definitions.calculate_union_conditional(row, ['HeartRateMedian'],
'ActivityTimeActive'),
        'HeartRateMinActive': lambda row, data_frequency_minutes: variable_definitions.calculate_union_conditional(row, ['HeartRateMin'],
'ActivityTimeActive'),
        'HeartRateMaxActive': lambda row, data_frequency_minutes: variable_definitions.calculate_union_conditional(row, ['HeartRateMax'],
'ActivityTimeActive'),
        'HeartRateStdevActive': lambda row, data_frequency_minutes: variable_definitions.calculate_union_conditional(row, ['HeartRateStdev'],
'ActivityTimeActive'),

        'HeartRateMeanAsleep': lambda row, data_frequency_minutes: variable_definitions.calculate_union_conditional(row, ['HeartRateMean'],
'SleepTimeAsleep'),
        'HeartRateMedianAsleep': lambda row, data_frequency_minutes: variable_definitions.calculate_union_conditional(row, ['HeartRateMedian'],
'SleepTimeAsleep'),
        'HeartRateMinAsleep': lambda row, data_frequency_minutes: variable_definitions.calculate_union_conditional(row, ['HeartRateMin'],
'SleepTimeAsleep'),
        'HeartRateMaxAsleep': lambda row, data_frequency_minutes: variable_definitions.calculate_union_conditional(row, ['HeartRateMax'],
'SleepTimeAsleep'),
        'HeartRateStdevAsleep': lambda row, data_frequency_minutes: variable_definitions.calculate_union_conditional(row, ['HeartRateStdev'],
'SleepTimeAsleep'),

        'HeartRateMeanAwake': lambda row, data_frequency_minutes: variable_definitions.calculate_union_conditional(row, ['HeartRateMean'],
'SleepTimeAwake'),
        'HeartRateMedianAwake': lambda row, data_frequency_minutes: variable_definitions.calculate_union_conditional(row, ['HeartRateMedian'],
'SleepTimeAwake'),
        'HeartRateMinAwake': lambda row, data_frequency_minutes: variable_definitions.calculate_union_conditional(row, ['HeartRateMin'],
'SleepTimeAwake'),
        'HeartRateMaxAwake': lambda row, data_frequency_minutes: variable_definitions.calculate_union_conditional(row, ['HeartRateMax'],
```



```
'SleepTimeAwake'),  
    'HeartRateStdevAwake': lambda row, data_frequency_minutes: variable_definitions.calculate_union_conditional(row, ['HeartRateStdev'],  
'SleepTimeAwake'),  
  
    'HeartRateMeanRestless': lambda row, data_frequency_minutes: variable_definitions.calculate_union_conditional(row, ['HeartRateMean'],  
'SleepTimeRestless'),  
    'HeartRateMedianRestless': lambda row, data_frequency_minutes: variable_definitions.calculate_union_conditional(row, ['HeartRateMedian'],  
'SleepTimeRestless'),  
    'HeartRateMinRestless': lambda row, data_frequency_minutes: variable_definitions.calculate_union_conditional(row, ['HeartRateMin'],  
'SleepTimeRestless'),  
    'HeartRateMaxRestless': lambda row, data_frequency_minutes: variable_definitions.calculate_union_conditional(row, ['HeartRateMax'],  
'SleepTimeRestless'),  
    'HeartRateStdevRestless': lambda row, data_frequency_minutes: variable_definitions.calculate_union_conditional(row, ['HeartRateStdev'],  
'SleepTimeRestless'),  
  
    'HeartRateMeanAsleepAwake': lambda row, data_frequency_minutes: variable_definitions.calculate_union_conditional(row, ['HeartRateMean'],  
'SleepTimeAsleepAwake'),  
    'HeartRateMedianAsleepAwake': lambda row, data_frequency_minutes: variable_definitions.calculate_union_conditional(row, ['HeartRateMedian'],  
'SleepTimeAsleepAwake'),  
    'HeartRateMinAsleepAwake': lambda row, data_frequency_minutes: variable_definitions.calculate_union_conditional(row, ['HeartRateMin'],  
'SleepTimeAsleepAwake'),  
    'HeartRateMaxAsleepAwake': lambda row, data_frequency_minutes: variable_definitions.calculate_union_conditional(row, ['HeartRateMax'],  
'SleepTimeAsleepAwake'),  
    'HeartRateStdevAsleepAwake': lambda row, data_frequency_minutes: variable_definitions.calculate_union_conditional(row, ['HeartRateStdev'],  
'SleepTimeAsleepAwake'),  
  
    'HeartRateMeanAwakeRestless': lambda row, data_frequency_minutes: variable_definitions.calculate_union_conditional(row, ['HeartRateMean'],  
'SleepTimeAwakeRestless'),  
    'HeartRateMedianAwakeRestless': lambda row, data_frequency_minutes: variable_definitions.calculate_union_conditional(row, ['HeartRateMedian'],  
'SleepTimeAwakeRestless'),  
    'HeartRateMinAwakeRestless': lambda row, data_frequency_minutes: variable_definitions.calculate_union_conditional(row, ['HeartRateMin'],  
'SleepTimeAwakeRestless'),  
    'HeartRateMaxAwakeRestless': lambda row, data_frequency_minutes: variable_definitions.calculate_union_conditional(row, ['HeartRateMax'],  
'SleepTimeAwakeRestless'),  
    'HeartRateStdevAwakeRestless': lambda row, data_frequency_minutes: variable_definitions.calculate_union_conditional(row, ['HeartRateStdev'],  
'SleepTimeAwakeRestless'),
```

```

        'HeartRateMeanAsleepRestless': lambda row, data_frequency_minutes: variable_definitions.calculate_union_conditional(row, ['HeartRateMean'],
'SleepTimeAsleepRestless'),
        'HeartRateMedianAsleepRestless': lambda row, data_frequency_minutes: variable_definitions.calculate_union_conditional(row,
['HeartRateMedian'], 'SleepTimeAsleepRestless'),
        'HeartRateMinAsleepRestless': lambda row, data_frequency_minutes: variable_definitions.calculate_union_conditional(row, ['HeartRateMin'],
'SleepTimeAsleepRestless'),
        'HeartRateMaxAsleepRestless': lambda row, data_frequency_minutes: variable_definitions.calculate_union_conditional(row, ['HeartRateMax'],
'SleepTimeAsleepRestless'),
        'HeartRateStdevAsleepRestless': lambda row, data_frequency_minutes: variable_definitions.calculate_union_conditional(row, ['HeartRateStdev'],
'SleepTimeAsleepRestless'),

        'HeartRateMeanSleeping': lambda row, data_frequency_minutes: variable_definitions.calculate_union_conditional(row, ['HeartRateMean'],
'SleepTimeTotal'),
        'HeartRateMedianSleeping': lambda row, data_frequency_minutes: variable_definitions.calculate_union_conditional(row, ['HeartRateMedian'],
'SleepTimeTotal'),
        'HeartRateMinSleeping': lambda row, data_frequency_minutes: variable_definitions.calculate_union_conditional(row, ['HeartRateMin'],
'SleepTimeTotal'),
        'HeartRateMaxSleeping': lambda row, data_frequency_minutes: variable_definitions.calculate_union_conditional(row, ['HeartRateMax'],
'SleepTimeTotal'),
        'HeartRateStdevSleeping': lambda row, data_frequency_minutes: variable_definitions.calculate_union_conditional(row, ['HeartRateStdev'],
'SleepTimeTotal'),

        'HeartRateMean': lambda row, data_frequency_minutes: variable_definitions.calculate_union_conditional(row, ['HeartRateMean'],
'ActivityTimeTotal'),
        'HeartRateMedian': lambda row, data_frequency_minutes: variable_definitions.calculate_union_conditional(row, ['HeartRateMedian'],
'ActivityTimeTotal'),
        'HeartRateMin': lambda row, data_frequency_minutes: variable_definitions.calculate_union_conditional(row, ['HeartRateMin'],
'ActivityTimeTotal'),
        'HeartRateMax': lambda row, data_frequency_minutes: variable_definitions.calculate_union_conditional(row, ['HeartRateMax'],
'ActivityTimeTotal'),
        'HeartRateStdev': lambda row, data_frequency_minutes: variable_definitions.calculate_union_conditional(row, ['HeartRateStdev'],
'ActivityTimeTotal'),
    }
]

```

```

@staticmethod
def calculate_union(row, columns):
    found = False
    summation = 0.0

    for column in columns:
        if column in row:
            if (row[column] is not None) and (not np.isnan(row[column])):
                summation = summation + row[column]
                found = True

    if found:
        return summation

    return np.nan

@staticmethod
def calculate_union_frequency(row, columns, frequency):
    result = variable_definitions.calculate_union(row, columns)

    if result is None:
        return np.nan

    return result * frequency

@staticmethod
def calculate_union_conditional(row, columns, column_condition):
    if (row[column_condition] is None) or np.isnan(row[column_condition]):
        return np.nan

    return variable_definitions.calculate_union(row, columns)

```

## variable\_derivator.py

```

from variable_definitions import variable_definitions
from variable_properties import variable_properties

```

```
import numpy as np

class variable_derivator:
    def __init__(self, date_numeric_column):
        self.date_numeric_column = date_numeric_column

    def derive(self, df_duration):
        print('derive')
        data_frequency_minutes = variable_properties.data_frequency_minutes

        for variable_definition_stage in variable_definitions.definitions:
            for variable_name, definition in variable_definition_stage.items():
                df_duration[variable_name] = df_duration.apply(lambda row: definition(row, data_frequency_minutes), axis = 1)
                print('Derived {}'.format(variable_name))

        print('derive finished')
        return df_duration

    @staticmethod
    def calculate_union(row, columns):
        summation = 0

        for column in columns:
            if column in row:
                if not np.isnan(row[column]):
                    summation = summation + row[column]

        return summation

    @staticmethod
    def calculate_union_conditional(row, columns, column_condition):
        summation = 0

        if np.isnan(row[column_condition]):
            return summation
```

```
for column in columns:
    if column in row:
        if not np.isnan(row[column]):
            summation = summation + row[column]

return summation
```

## variable\_properties.py

```
import numpy as np

class variable_properties:
    behaviours_aggregates = {
        'steps': {
            'StepsCount': np.sum
        },
        'activity': {
            'ActivityTimeSedentaryAwake': np.sum,
            'ActivityTimeSedentaryLightAwake': np.sum,
            'ActivityTimeLight': np.sum,
            'ActivityTimeLightFair': np.sum,
            'ActivityTimeFair': np.sum,
            'ActivityTimeFairVigorous': np.sum,
            'ActivityTimeVigorous': np.sum,
            'ActivityTimeActive': np.sum,
            'SleepTimeTotal': np.sum
        },
        'sleep': {
            'SleepTimeAsleep': np.sum,
            'SleepTimeAwake': np.sum,
            'SleepTimeRestless': np.sum,
            'SleepTimeAsleepAwake': np.sum,
            'SleepTimeAwakeRestless': np.sum,
            'SleepTimeAsleepRestless': np.sum,
            'SleepTimeTotal': np.sum
        }
    }
```

```
    },
    'heart': {
        'HeartRateMin': np.mean,
        'HeartRateMean': np.mean,
        'HeartRateMedian': np.mean,
        'HeartRateMax': np.mean,
        'HeartRateStdev': np.mean
    }
}

data_frequency_minutes = 15

event_variable_aggregates = {
    'AverageVentricularRate': np.mean,
    'MaximumVentricularRate': np.max,
    'Duration': np.max
}

target_column_period_aggregation_functions = {
    'StepsCount': {'mean': np.mean},
    'ActivityTimeSedentaryAwake': {'mean': np.mean},
    'ActivityTimeSedentaryLightAwake': {'mean': np.mean},
    'ActivityTimeLight': {'mean': np.mean},
    'ActivityTimeLightFair': {'mean': np.mean},
    'ActivityTimeFair': {'mean': np.mean},
    'ActivityTimeFairVigorous': {'mean': np.mean},
    'ActivityTimeVigorous': {'mean': np.mean},
    'SleepTimeAsleep': {'mean': np.mean},
    'SleepTimeAwake': {'mean': np.mean},
    'SleepTimeRestless': {'mean': np.mean},
    'SleepTimeAsleepAwake': {'mean': np.mean},
    'SleepTimeAwakeRestless': {'mean': np.mean},
    'SleepTimeAsleepRestless': {'mean': np.mean},
    'SleepTimeTotal': {'mean': np.mean},
    'HeartRateMean': {'mean': np.mean},
    'HeartRateMedian': {'median': np.median},
```

```
'HeartRateMin': {'min': np.min},
'HeartRateMax': {'max': np.max},
'HeartRateStdev': {'std': np.std},
}

target_column_weekly_aggregation_functions = {
    'StepsCount': {'mean': np.mean},
    'ActivityTimeSedentaryAwake': {'mean': np.mean},
    'ActivityTimeSedentaryLightAwake': {'mean': np.mean},
    'ActivityTimeLight': {'mean': np.mean},
    'ActivityTimeLightFair': {'mean': np.mean},
    'ActivityTimeFair': {'mean': np.mean},
    'ActivityTimeFairVigorous': {'mean': np.mean},
    'ActivityTimeVigorous': {'mean': np.mean},
    'SleepTimeAsleep': {'mean': np.mean},
    'SleepTimeAwake': {'mean': np.mean},
    'SleepTimeRestless': {'mean': np.mean},
    'SleepTimeAsleepAwake': {'mean': np.mean},
    'SleepTimeAwakeRestless': {'mean': np.mean},
    'SleepTimeAsleepRestless': {'mean': np.mean},
    'SleepTimeTotal': {'mean': np.mean},
    'HeartRateMean': {'mean': np.mean},
    'HeartRateMedian': {'median': np.median},
    'HeartRateMin': {'min': np.min},
    'HeartRateMax': {'max': np.max},
    'HeartRateStdev': {'std': np.std},
}

target_column_daily_aggregation_functions = {
    'StepsCount': {'sum': np.sum},
    'ActivityTimeSedentaryAwake': {'sum': np.sum},
    'ActivityTimeSedentaryLightAwake': {'sum': np.sum},
    'ActivityTimeLight': {'sum': np.sum},
    'ActivityTimeLightFair': {'sum': np.sum},
    'ActivityTimeFair': {'sum': np.sum},
    'ActivityTimeFairVigorous': {'sum': np.sum},
}
```

```
'ActivityTimeVigorous': {'sum': np.sum},
'SleepTimeAsleep': {'mean': np.mean},
'SleepTimeAwake': {'mean': np.mean},
'SleepTimeRestless': {'mean': np.mean},
'SleepTimeAsleepAwake': {'mean': np.mean},
'SleepTimeAwakeRestless': {'mean': np.mean},
'SleepTimeAsleepRestless': {'mean': np.mean},
'SleepTimeTotal': {'sum': np.sum},
'HeartRateMean': {'mean': np.mean},
'HeartRateMedian': {'median': np.median},
'HeartRateMin': {'min': np.min},
'HeartRateMax': {'max': np.max},
'HeartRateStdev': {'std': np.std},
}
```

## R

### main.r

```
library(survival)

behaviours <- c(
  'StepsCount',
  'ActivityTimeLight',
  'ActivityTimeLightFair',
  'ActivityTimeFair',
  'ActivityTimeFairVigorous',
  'ActivityTimeVigorous',
  'SleepTimeTotal',
  'HeartRateMean',
  'HeartRateMedian',
  'HeartRateMin',
  'HeartRateMax',
  'HeartRateStdev',
  'SleepTimeAsleep',
  'SleepTimeAwake',
```



```

#'SleepTimeRestless',
#'SleepTimeAsleepAwake',
#'SleepTimeAwakeRestless',
#'SleepTimeAsleepRestless',
#'SleepTimeTotal',
#'SleepTimeTotalKnown'
)

period_durations <- c(1, 2, 3, 4, 5, 6, 7, 8)
aggregates <- c("sum", "max", "min", "mean", "median", "stdev")
flavours <- c("separate", "cumulative")

# First grid search.
# minimum_available_data_ratios_daily_sedentary <- c("0.9583333333333334", "0.75", "0.875")

# Second grid search.
# minimum_available_data_ratios_daily_sedentary <- c("0.041666666666666664", "0.020833333333333332", "0.010416666666666666")

# Third grid search.
minimum_available_data_ratios_daily_sedentary <- c("0.08333333333333333", "0.16666666666666666", "0.3333333333333333", "0.6666666666666666")

minimum_available_data_ratios_weekly <- c("0.51", "0.76", "0.99")
minimum_available_data_ratios_period <- c("0.51", "0.76", "0.99")

allows_zeros <- c("False")
allows_no_event_participants <- c("True")

regression_eps <- 0.000001
significance_threshold <- 0.05
min_or <- 0.001
max_or <- 1000

sink(file <- "data/conditional_logit_periods.html")

print(noquote('<html><body><table border=1 valign=top>'))
print(noquote('<tr><th colspan=2>Daily</th>'))

```

```

for (minimum_available_data_ratio_daily_active in minimum_available_data_ratios_daily_sedentary) {
  print(noquote(sprintf('<th colspan=%d>%s</th>', length(minimum_available_data_ratios_weekly), minimum_available_data_ratio_daily_active)))
}

print(noquote('</tr>'))

print(noquote('<tr><th colspan=2>Weekly</th>'))

for (minimum_available_data_ratio_daily_active in minimum_available_data_ratios_daily_sedentary) {
  for (minimum_available_data_ratio_weekly in minimum_available_data_ratios_weekly) {
    print(noquote(sprintf('<th>%s</th>', minimum_available_data_ratio_weekly)))
  }
}

print(noquote('</tr>'))

print(noquote('<tr><th colspan=2>Period</th>'))

for (minimum_available_data_ratio_daily_active in minimum_available_data_ratios_daily_sedentary) {
  for (minimum_available_data_ratio_weekly in minimum_available_data_ratios_weekly) {
    for (minimum_available_data_ratio_period in minimum_available_data_ratios_period) {
      if (minimum_available_data_ratio_weekly == minimum_available_data_ratio_period) {
        print(noquote(sprintf('<th>%s</th>', minimum_available_data_ratio_period)))
      }
    }
  }
}

print(noquote('</tr>'))

for (allow_zeros in allows_zeros) {
  for (allow_no_event_participants in allows_no_event_participants) {
    print(noquote(sprintf('<tr><th>%s</th><th>%s</th>', allow_zeros, allow_no_event_participants)))

    for (minimum_available_data_ratio_daily_active in minimum_available_data_ratios_daily_sedentary) {

```

```

for (minimum_available_data_ratio_weekly in minimum_available_data_ratios_weekly) {
  for (minimum_available_data_ratio_period in minimum_available_data_ratios_period) {
    if (minimum_available_data_ratio_weekly == minimum_available_data_ratio_period) {
      print(noquote('<td>'))
      for (flavour in flavours) {
        mentioned_flavour <- 0
        for (behaviour in behaviours) {
          has_behaviour <- 0
          p_value <- 1000000.0
          odds_ratio <- 0.0
          all_period_found <- c(FALSE, FALSE, FALSE, FALSE, FALSE, FALSE, FALSE, FALSE)
          all_period_min_effects <- c(1000000.0, 1000000.0, 1000000.0, 1000000.0, 1000000.0, 1000000.0, 1000000.0, 1000000.0)
          all_period_max_effects <- c(-1000000.0, -1000000.0, -1000000.0, -1000000.0, -1000000.0, -1000000.0, -1000000.0, -1000000.0)
          all_period_effects_min_pvalues <- c(0.0, 0.0, 0.0, 0.0, 0.0, 0.0, 0.0, 0.0)
          all_period_models_min_pvalues <- c("-", "-", "-", "-", "-", "-", "-", "-")
          all_period_min_pvalues <- c(1000000.0, 1000000.0, 1000000.0, 1000000.0, 1000000.0, 1000000.0, 1000000.0, 1000000.0)
          min_effect <- 1000000.0
          max_effect <- -1000000.0
          for (daily_aggregate in aggregates) {
            if (min_effect < -regression_eps && max_effect > regression_eps) {
              break
            }

            for (weekly_aggregate in aggregates) {
              if (min_effect < -regression_eps && max_effect > regression_eps) {
                break
              }

              for (period_aggregate in aggregates) {
                if (min_effect < -regression_eps && max_effect > regression_eps) {
                  break
                }

                for (period_duration in period_durations) {
                  if (min_effect < -regression_eps && max_effect > regression_eps) {
                    break
                  }
                }
              }
            }
          }
        }
      }
    }
  }
}

```

```

    }

    dataset_file_name_flavour_format <-
paste('data/result_data/dataset_%s_period_%i_behaviour_%s_daily_%s_weekly_%s_period_%s_mindaily_%s_minweekly_%s_minperiod_%s_zeros_%s_paired_%s.csv')
    dataset_file_name <- sprintf(dataset_file_name_flavour_format, flavour, period_duration, behaviour,
                                daily_aggregate, weekly_aggregate, period_aggregate,
                                minimum_available_data_ratio_daily_active, minimum_available_data_ratio_weekly,
minimum_available_data_ratio_period,
                                allow_zeros, allow_no_event_participants)

    if (file.exists(dataset_file_name)) {
    data <- read.csv(file <- dataset_file_name)
    data <- transform(data, has_event_numeric=ifelse(has_event=="True", 1, 0))

    model <- clogit(has_event_numeric ~ value + factor(season) + factor(week_day_weekend_day), data=data, method="approximate")

    summary <- summary(model)
    pvalue <- summary$coefficients[1, 5]
    param <- summary$coefficients[1, 1]

    if (!is.na(pvalue) && !is.na(param)) {
    if (pvalue < 0) {
    print(noquote(summary))
    stop("P-value should be positive")
    }

    if (pvalue < significance_threshold) {
    has_behaviour <- 1

    min_effect <- min(min_effect, param)
    max_effect <- max(max_effect, param)
    all_period_found[period_duration] <- TRUE
    all_period_min_effects[period_duration] <- min(all_period_min_effects[period_duration], param)
    all_period_max_effects[period_duration] <- max(all_period_max_effects[period_duration], param)

    p_value <- min(p_value, pvalue)

```

```

    if (pvalue < all_period_min_pvalues[period_duration]) {
      all_period_min_pvalues[period_duration] <- pvalue
      all_period_effects_min_pvalues[period_duration] <- param
      model_name <- "S+WD/WE"
      all_period_models_min_pvalues[period_duration] <- model_name
    }
  }
}

model <- clogit(has_event_numeric ~ value + factor(season) + factor(week_day), data=data, method="approximate")

summary <- summary(model)
pvalue <- summary$coefficients[1, 5]
param <- summary$coefficients[1, 1]

if (!is.na(pvalue) && !is.na(param)) {
  if (pvalue < 0) {
    print(noquote(summary))
    stop("P-value should be positive")
  }

  if (pvalue < significance_threshold) {
    has_behaviour <- 1

    min_effect <- min(min_effect, param)
    max_effect <- max(max_effect, param)
    all_period_found[period_duration] <- TRUE
    all_period_min_effects[period_duration] <- min(all_period_min_effects[period_duration], param)
    all_period_max_effects[period_duration] <- max(all_period_max_effects[period_duration], param)

    p_value <- min(p_value, pvalue)

    if (pvalue < all_period_min_pvalues[period_duration]) {
      all_period_min_pvalues[period_duration] <- pvalue
      all_period_effects_min_pvalues[period_duration] <- param
    }
  }
}

```

```

        model_name <- "S+WD"
        all_period_models_min_pvalues[period_duration] <- model_name
    }
}

model <- clogit(has_event_numeric ~ value + factor(season), data=data, method="approximate")

summary <- summary(model)
pvalue <- summary$coefficients[1, 5]
param <- summary$coefficients[1, 1]

if (!is.na(pvalue) && !is.na(param)) {
  if (pvalue < 0) {
    print(noquote(summary))
    stop("P-value should be positive")
  }

  if (pvalue < significance_threshold) {
    has_behaviour <- 1

    min_effect <- min(min_effect, param)
    max_effect <- max(max_effect, param)
    all_period_found[period_duration] <- TRUE
    all_period_min_effects[period_duration] <- min(all_period_min_effects[period_duration], param)
    all_period_max_effects[period_duration] <- max(all_period_max_effects[period_duration], param)

    p_value <- min(p_value, pvalue)

    if (pvalue < all_period_min_pvalues[period_duration]) {
      all_period_min_pvalues[period_duration] <- pvalue
      all_period_effects_min_pvalues[period_duration] <- param
      model_name <- "S"
      all_period_models_min_pvalues[period_duration] <- model_name
    }
  }
}

```

```

    }
  }
}

if (has_behaviour == 1) {
  strike <- 0

  if (min_effect < -regression_eps && max_effect > regression_eps) {
    strike <- 1
  }

  sign <- "?"
  odds_ratio <- 1.0
  odds_ratio_min_pvalue <- 1.0

  if (min_effect < -regression_eps) {
    sign <- "-"
    odds_ratio <- exp(min_effect)
  }

  if (max_effect > regression_eps) {
    sign <- "+"
    odds_ratio <- exp(max_effect)
  }

  if (odds_ratio > min_or && odds_ratio < max_or) {
    if (mentioned_flavour == 0) {
      print(noquote(sprintf('<b>%s</b><br />', flavour)))
      mentioned_flavour <- 1
    }

    print(noquote(sprintf('%s: %s<br />', behaviour, sign)))
  }
}
```

```

for(i in period_durations) {
  if (isTRUE(all_period_found[i])) {
    extreme_or_pvalue <- exp(all_period_effects_min_pvalues[i])
    extreme_pvalue <- all_period_min_pvalues[i]
    extreme_model_pvalue <- all_period_models_min_pvalues[i]

    extreme_or <- 1.0

    if (min_effect < -regression_eps) {
      extreme_or <- exp(all_period_min_effects[i])
    }

    if (max_effect > regression_eps) {
      extreme_or <- exp(all_period_max_effects[i])
    }

    if (strike == 1) {
      print(noquote(sprintf('<del><b>%s weeks</b>: or=%.3f (or.p=%.3f, p=%.3f, m=%s)</del><br />', i, extreme_or, extreme_or_pvalue,
extreme_pvalue, extreme_model_pvalue)))
    } else {
      print(noquote(sprintf('<b>%s</b>: or=%.3f (or.p=%.3f, p=%.3f, m=%s)<br />', i, extreme_or, extreme_or_pvalue, extreme_pvalue,
extreme_model_pvalue)))
    }
  }
}

print(noquote('</td>'))
}
}
}
}
}
}
}
}
}
}

```



```
    print(noquote('</tr>'))
  }
}

print(noquote('</table></body></html>'))

sink(file <- NULL)

print("Done")
```
